# Supplementary material
Source: PubMed Central journal article supplement (PMC5500212)
Supplement: NIHMS873900-supplement-Supplementary_Material.pdf [file NIHMS873900-supplement-Supplementary_Material.pdf]

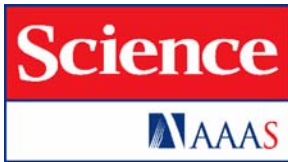

Supplementary Materials for  
**Two genes substitute for the mouse Y chromosome for spermatogenesis  
and reproduction**

Yasuhiro Yamauchi, Jonathan M. Riel, Victor A. Ruthig, Eglè A. Ortega,  
Michael J. Mitchell, Monika A. Ward\*

Corresponding author. E-mail: [mward@hawaii.edu](mailto:mward@hawaii.edu)

Published 29 January 2016, *Science* **351**, 514 (2016)  
DOI: 10.1126/science.aad1795

**This PDF file includes**

Materials and Methods  
Supplementary Text  
Figs. S1 to S12  
Tables S1 to S4  
References  
Movie legend S1

**Other Supplementary Material for this manuscript includes the following:**  
(available at [www.sciencemag.org/content/351/6272/514/suppl/DC1](http://www.sciencemag.org/content/351/6272/514/suppl/DC1))

Movie S1

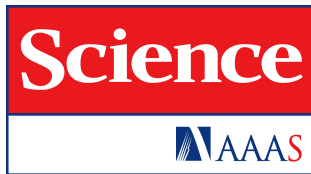

## Supplementary Materials for

Two genes substitute for the mouse Y chromosome for spermatogenesis and reproduction

Yasuhiro Yamauchi<sup>1</sup>, Jonathan M. Riel<sup>1</sup>, Victor A. Ruthig<sup>1</sup>, Eglè A. Ortega<sup>1</sup>, Michael J. Mitchell<sup>2</sup>, and Monika A. Ward<sup>1</sup>.

correspondence to: [mward@hawaii.edu](mailto:mward@hawaii.edu)

**This PDF file includes:**

Materials and Methods  
Supplementary Text  
Figs. S1 to S12  
Tables S1 to S4  
Caption for Movie S1

**Other Supplementary Materials for this manuscript includes the following:**

Movie S1

## Materials and Methods

### Chemicals and Media

Pregnant mares' serum gonadotrophin (eCG) and human chorionic gonadotrophin (hCG) were purchased from Calbiochem (San Diego, CA). All other chemicals were obtained from Sigma Chemical Co. (St Louis, MO) unless otherwise stated. Round spermatid and oocyte collection and subsequent manipulation, including microinjections were done in HEPES-buffered CZB medium (HEPES-CZB) (19). Culture of round spermatid-injected oocytes and embryos was done in CZB medium (20).

### Animals

Six-to-twelve week-old B6D2F1 (C57BL/6J x DBA/2) females (NCI, Raleigh, NC) were used as oocyte donors for injections and CD-1 (Charles River, Wilmington, MA) or Swiss Webster (NCI, Raleigh, NC) mice were used as vasectomized males and surrogate/foster females for embryo transfer.

The mice of interest in this study were mice with a single X chromosome (XO) and limited Y gene complement:

1. **X<sup>Eif2s3y</sup>OSox9** (abbreviated as X<sup>E</sup>OSox9) are males carrying an autosomally-encoded *Sox9* transgene driven by *Wtl* (Wilms tumor 1) promoter (3) and the X chromosome-located transgene encoding spermatogonial proliferation factor *Eif2s3y* (5); the X chromosome carrying the *Eif2s3y* transgene is designated as X<sup>E</sup>. We obtained cryopreserved sperm samples from XY*Sox9* transgenic males from Andreas Schedl (Inserm, France). These samples were used for intracytoplasmic sperm injection (ICSI) to generate live XY*Sox9* males. The X<sup>E</sup>OSox9 males were then produced in 3 steps (Fig. S1A). In step 1, XY*Sox9* males were bred to sex reversed XY<sup>Tdym1</sup> females, which carry an X chromosome and a Y chromosome with an 11-kb deletion removing the testis determinant *Sry* (*dl1Rlb*) (21, 22). This resulted in obtaining XY<sup>Tdym1</sup>*Sox9* males, in which sex determination was driven by *Sox9* in the absence of *Sry* but with the remaining Y chromosome genes present. In step 2, the XY<sup>Tdym1</sup>*Sox9* males were crossed to X<sup>E</sup>X<sup>E</sup> females, in which both X chromosomes carried the *Eif2s3y* transgene, in order to produce X<sup>E</sup>Y<sup>Tdym1</sup>*Sox9* males. In step 3, the X<sup>E</sup>Y<sup>Tdym1</sup>*Sox9* males were bred to X<sup>Paf</sup>O (abbreviated as X<sup>P</sup>O) (23) carrying the X-linked coat marker *Patchy-fur* (24).
2. **XOSry,Eif2s3x** are males carrying an autosomally-encoded *Sry* transgene (25) and an autosomally encoded *Eif2s3x* transgene. We first generated mice transgenic for *Eif2s3x*. The bacterial artificial chromosome (BAC) clone containing *Eif2s3x* and 21 kb upstream of its transcription site was placed in pBeloBAC11 vector, resulting in a ~118 kb construct that was used for pronuclear microinjections. Six founders had germline transmission and were propagated. The males from lines with significant *Eif2s3x* expression in testes and other tissues were used to obtain XX*Eif2s3x* transgenic females. The XOSry,*Eif2s3x* males were then produced in two steps (Fig. S1B). In step 1, the XX*Eif2s3x* females were bred to XY<sup>Tdym1</sup>*Sry* males that have the X chromosome carrying an *Eif2s3y* transgene (5) and a Y chromosome with an 11-kb deletion removing the testis determinant *Sry* (*dl1Rlb*) (21, 22), complemented by an autosomally-located *Sry* transgene [Tg(Sry)2Ei] (25). In step 2, the

XY<sup>Tdym1</sup>Sry,Eif2s3x males (XY<sup>Tdym1</sup>Sry transgenic for autosomally encoded Eif2s3x) obtained in step 1 were bred with X<sup>P</sup>O females.

3. **XO<sup>Sox9,Eif2s3x</sup>** are males carrying an autosomally-encoded Sox9 transgene driven by *Wt1* (Wills tumor 1) promoter (3) and an autosomally encoded Eif2s3x transgene. The XO<sup>Sox9,Eif2s3x</sup> males were produced by crossing XX<sup>Eif2s3x</sup> females with XY<sup>Tdym1</sup>Sox9 males and then the resulting XY<sup>Tdym1</sup>Sox9,Eif2s3x to X<sup>P</sup>O females (Fig. 1SC).

In addition to these three primary genotypes of interest, we also examined mice with two Y chromosome genes, X<sup>Eif2s3y</sup>O<sup>Sry</sup> (abbreviated as X<sup>E</sup>O<sup>Sry</sup>). These males carry an autosomally-encoded Sry (25) and X chromosome encoded Eif2s3y (5) transgenes, in the context of a single X chromosome. The X<sup>E</sup>O<sup>Sry</sup> males were produced ‘in house’ by breeding X<sup>Paf</sup>O or X<sup>Paf</sup>Y\*<sup>X</sup> females (23) carrying the X-linked coat marker *Patchy-fur* (24) and X<sup>Eif2s3y</sup>Y<sup>Tdym1</sup>Sry males that have the X chromosome carrying an Eif2s3y transgene (5) and a Y chromosome with an 11-kb deletion removing the testis determinant Sry (*dl1Rlb*) (21, 22), complemented by an autosomally-located Sry transgene [Tg(Sry)2Ei] (25).

The breeding crosses yielded a variety of progeny genotypes; the males of interest were identified among the progeny by genotyping for Y chromosome markers, scoring fur appearance, and evaluation of testes size. All mice with limited Y gene complement were on partial MF1 genetic background. The XY<sup>RIII</sup> on MF1 background and XY B6D2F1 males were used as wild-type controls.

The mice were fed ad libitum with a standard diet and maintained in a temperature and light-controlled room (22°C, 14h light/10h dark), in accordance with the guidelines of the Laboratory Animal Services at the University of Hawaii and guidelines presented in National Research Council’s (NCR) “Guide for Care and Use of Laboratory Animals” published by Institute for Laboratory Animal Research (ILAR) of the National Academy of Science, Bethesda, MD, 2011. The protocol for animal handling and treatment procedures was reviewed and approved by the Animal Care and Use Committee at the University of Hawaii.

#### Testicular material collection and preparation

Testes were collected twice from each male following initial semi-castration. Each dissected testis was weighed, photographed if needed, and divided into 3 parts: half for Bouin fixation and subsequent sectioning, one-fourth for preparation of testicular cell suspension for injections, and one-fourth for storage at -80°C and subsequent molecular or cytogenetic analyses.

#### Histology analysis

For histology analysis, part of the testes were fixed in Bouin overnight and then stored in 70% ethanol prior to embedding in paraffin wax, sectioning at 5 μm, and staining with hematoxylin-eosin (H&E) and Periodic acid Schiff and hematoxylin (PAS-H). The stages of seminiferous tubules were identified based on the composition of cells near the basal membrane according to the method described by Ahmed (26). This was necessary because of meiotic and post-meiotic arrests present in males with limited Y gene complement, which prevented staging based on the changes of acrosome and nuclear morphology of spermatids. For quantitative analysis of spermatogenesis

progression, for each male 10 tubules were examined per stage category and the numbers of spermatogonia, round spermatids, and Sertoli cells were counted. The data were expressed as germ cell/Sertoli cell ratios. For *XOSry*, which could not be staged due to lack of spermatogenesis, 60 randomly chosen tubules were used for cell counts.

#### Round spermatid injection (ROSI)

All ROSI offspring were derived using spermatids from males on partial (transgenics) or full MF1 (XY) genetic background and oocytes from B6D2F1 females. The metaphase II (MII) oocytes for ROSI were collected from superovulated (5 iu eCG and 5 iu hCG given 48 hours apart) female mice and incubated at 37°C, 5% CO<sub>2</sub> until injection. Testicular cell suspension was diluted with HEPES-CZB containing 1% (w/v) polyvinyl pyrrolidone (PVP) on the injection dish. Spermatids were injected individually into the oocytes. The total duration of ROSI was no longer than 1 hour. The oocytes were activated shortly after injection by incubation in Ca<sup>2+</sup>-free CZB medium supplemented with 2.5 mM SrCl<sub>2</sub> at 37°C, 5% CO<sub>2</sub> for 4 hrs, after which time they were transferred into standard CZB medium for subsequent culture. At ~6-8 hrs after injection the oocytes were assessed for polar body extrusion and pronuclei development. Normally fertilized oocytes exhibiting two pronuclei (PN) and extruded second polar body (PBII) as well as abnormally fertilized oocytes (with deviations from normal in regard of pronuclei and extruded polar body number) were differentiated. Twenty four hours after injection the oocytes in each group were scored for cleavage. Embryo transfer was performed with the 2-cell embryos derived from normally fertilized oocytes. Surrogate mothers were subjected to caesarian section on day 20 of pregnancy to allow for scoring of the numbers of fetuses and implantation sites.

#### ROSI progeny analyses

All offspring were raised by foster mothers until weaning, allowed to mature, and bred (if applicable). All offspring were genotyped by PCR to identify presence of *Eif2s3y*, *Eif2s3x*, *Sox9*, and *Sry* transgenes, and the sex chromosomes (primer sequences are shown in Table S4). Some of the offspring from *XOSox9,Eif2s3x* males were also tested for a battery of other Y chromosome genes to show that none were present. The overall health and well-being of some of the ROSI progeny were monitored carefully during the first 8 months of age, which included monthly body weight measures. Some of the ROSI offspring were maintained beyond 8 months of age, with the oldest progeny being now at 20 months of age. None from the mice that were maintained died prematurely or developed tumors.

#### Transgene copy number

Genomic DNA for *Eif2s3x* transgene copy number assessment was isolated from mouse tails using phenol chloroform extraction and ethanol precipitation. 5 ng/μl of DNA was used to amplify single copy X chromosome genes *Eif2s3x*, *Amelx* and *Prdx4* by qPCR using Power SYBR Green PCR Master Mix on QuantStudio 12K Flex machine (Applied Biosystems). The following conditions were used: 95°C for 10 min, followed by 37 cycles of 95°C for 10 sec and 60°C for 60 sec. *Eif2s3x* was amplified with *Eif2s3x-sp-CNAFP* and *Eif2s3x-sp-CNARP* primers (*Eif2s3x* (sp1), Table S4), which recognize both endogenous and transgenic *Eif2s3x* but do not recognize either of the *Eif2s3x* retroposons

or the Y chromosome gene *Eif2s3y*. XO samples were used as a reference control since they have a single X chromosome and are expected to show single copies of *Eif2s3x*, *Amelx* and *Prdx4*, and no copies of *Eif2s3y*. XX and XY samples were included to verify primer specificity. *Amelx* and *Prdx4* were run for each sample as quality and copy number controls. A minimum of three samples per genotype were tested in quadruplicate per assay. Copy number estimation for each gene was calculated with the  $\Delta\Delta\text{Ct}$  method using *Atr* as a housekeeping gene.  $\Delta\text{Ct}$  values were calculated as difference between tested gene and *Atr*.  $\Delta\Delta\text{Ct}$  values were calculated by subtracting  $\Delta\text{Ct}$  of tested gene from the reference samples. The copy numbers were calculated by raising 2 to the power of  $\Delta\Delta\text{Ct}$  ( $2^{\Delta\Delta\text{Ct}}$ ). *Eif2s3x* transgene copy number was inferred from a difference in *Eif2s3x* amplification readout between XO and transgenic samples, and established using a typical mathematical rounding, i.e. readout  $<1.5$  was scored as 1 and readout  $\geq 1.5$  as 2. Primer sequences are shown in Table S4.

### Real-time RT-PCR

For real-time reverse transcriptase polymerase chain reaction (RT-PCR), total testis RNA was extracted using Trizol and DNase I treatment (Ambion, Austin, TX, USA), and purified using an RNeasy kit (Qiagen, Valencia, CA, USA). Reverse transcription of polyadenylated RNA was performed with Superscript Reverse Transcriptase III, according to the manufacturer's guidelines (Invitrogen, Carlsbad, CA, USA). Real-time PCR was performed using SYBR Green PCR Master mix on an ABI QuantStudio 12K Flex machine (Applied Biosystems, Carlsbad, CA, USA). PCR reactions were incubated at 95°C for 10 min followed by 40 PCR cycles (10 s at 95°C and 60 s at 60°C).

The analysis of ovarian markers (Fig. S5H-J) was performed using primers for *FoxL2*, *Rspo1*, *Wnt4* with *Actb* and *Sdha* as loading controls. For analysis of *Eif2s3* expression (Fig. 2A-C&F, Fig. S10&S11), four types of PCR reactions were performed: (1) '*Eif2s3x*' amplifying endogenous and transgenic *Eif2s3x* transcripts, and the *Eif2s3x* X-linked retroposon *Gm2223*; (2) '*Eif2s3x* (sp2)' amplifying specifically endogenous and transgenic *Eif2s3x* transcripts but not the *Gm2223* or the *Eif2s3x-ps1* retroposons; (3) '*Eif2s3y*' amplifying endogenous and transgenic *Eif2s3y* transcripts; (4) '*Eif2s3x/y*' amplifying transcripts from both *Eif2s3x* and *Eif2s3y*, both endogenous and transgenic, and *Gm2223*. At least three mice per genotype were analyzed, all reactions were carried out in at least triplicates per assay, and two ubiquitously expressed genes (*Actb* and/or *Sdha*) were used as loading controls.  $\Delta\text{Ct}$  value for each individual sample was calculated by subtracting the average Ct of loading control(s) from the average Ct of a tested gene.  $\Delta\Delta\text{Ct}$  value was calculated by subtracting the  $\Delta\text{Ct}$  of each tested male from the average  $\Delta\text{Ct}$  of control samples (XO♂ or XY males in *Eif2s3* expression analysis and XX in ovarian marker analysis), which served as references. The data were expressed as a fold value of expression level. For *Eif2s3x/y* specific and global expression analysis PCR primer efficiencies were taken into consideration. A 5x serial dilution of cDNA template was used to obtain the efficiency (E) for each primer pair. The average CT values were plotted against  $\log_5$  cDNA concentrations, and the slope (a) was obtained to calculate (E) which equals to  $5^{-1/a}$ . Each plot yielded a trend line that had an  $R^2$  value greater than 0.99. The fold expression was calculated using the formula  $E^{\Delta\text{Ct}}$ . Primer sequences are shown in Table S4.

### Statistical analyses

Fisher's Exact Test was used to assess the differences between the genotypes for ROSI data and to analyze the progeny genotype frequencies. One-way or two-way ANOVA with post-hoc tests were used to analyze body weight data. Student's t-test was used for all other analyses.

### **Supplementary Text**

#### Replacement of *Sry* function by transgenic activation of *Sox9*

In most mammals, including humans, *Sry* is the leading gene in the sex determination pathway, which acts in developing gonads and induces the development of testes (21, 27). *Sox9* (*Sry*-related HMG box gene 9), encoded on chromosome 11, is a direct target of SRY (2) and plays a pivotal role in male sexual development. In both mice and humans, ablation of *Sox9* causes male-to-female phenotypic sex reversal (28-30) while *Sox9* gain-of-function results in male gonad differentiation (3, 31). Transgenic overexpression of *Sox9* driven by *Wtl* (Wilms tumor 1) promoter leads to sex reversal, with XX mice developing as males; these XX*Sox9* males have testes devoid of germ cells due to a toxic dosage of X chromosome genes and the lack of the Y chromosome genes critical for spermatogonial proliferation (3). We placed the *Wtl-Sox9* transgene in the context of a single X chromosome carrying the *Eif2s3y* transgene (Fig. S1A) producing X<sup>E</sup>O*Sox9* males (Table S1) with testis determination driven by transgenic overexpression of *Sox9* and the Y chromosome gene contribution limited to *Eif2s3y*. The analysis of testicular sections confirmed that spermatogenesis was ongoing allowing the development of germ cells with round spermatid-like morphology in all examined males (10/10). The numbers of spermatids were low and they arrested at step 7 of development (Fig. S2B). The quantitative analysis of spermatogenesis progression showed that spermatogonia/Sertoli cell and round spermatid/Sertoli cell ratios in X<sup>E</sup>O*Sox9* males were similar to those observed in X<sup>E</sup>O*Sry*, but 2- and 8-fold lower, respectively, than in XY (Fig. 1DE, Table S2). Round spermatids could be found in testicular cell suspensions from 8 out of 10 X<sup>E</sup>O*Sox9* males (Table 1). Following round spermatid injection (ROSI) the oocytes were successfully fertilized, and when the resulting 2-cell embryos were transferred into the oviducts of recipient females, live offspring were obtained from 7 out of 8 males. ROSI efficiency, measured as a proportion of offspring developed from transferred embryos (15.7%, Table 1), was similar to that reported previously for X<sup>E</sup>O*Sry* (9.1%, (1)) and that of XY controls (25%). We conclude that for the production of spermatids competent in assisted reproduction transgenic *Sox9* activation can substitute for the lack of *Sry* in mice without the Y chromosome but transgenic for *Eif2s3y*.

#### Replacement of *Eif2s3y* function by transgenic overexpression of *Eif2s3x*

*Eif2s3y* belongs to the eukaryotic translation initiation factor 2 subunit 3 protein family. It has an X chromosome encoded homologue, *Eif2s3x*, with which it retains 98% amino acid identity, despite only 86% nucleotide identity, an indication of strong selective constraint on both proteins (32). Both genes are ubiquitously expressed with strong expression in germ cells and represent a typical ancestral, single copy X-Y homologous gene pair, in which the X gene escapes X chromosome inactivation, and both X and Y copies are widely expressed in males (13, 18). We therefore hypothesized that if expression of *Eif2s3x* is high enough, it could substitute for *Eif2s3y* and replace its

function during the earliest phase of spermatogenesis. To test this hypothesis we produced mice transgenic for *Eif2s3x* using pronuclear microinjection and a bacterial artificial chromosome (BAC) clone encoding *Eif2s3x* and 21 kb upstream of its transcription site. In all 6 transmitting lines that were obtained (Tg1-6) the transgene incorporated on an autosome. The analysis of *Eif2s3x* expression in tissues from F1 and F2 transgenic XY males revealed that males of the Tg1,2,5&6 lines had elevated *Eif2s3x* levels (Fig. S2A). The *Eif2s3x* transgene was incorporated as a single copy in Tg2 and Tg6, as 2 copies in Tg5, and as 4 copies in Tg1 (Fig. S2B). The *Eif2s3x* transgene from the Tg1 line, which resulted in the strongest *Eif2s3x* overexpression, was placed in the context of XOSry through selective breeding (Fig. S1B). The resulting XOSry,*Eif2s3x* males (Table S1) had the Y chromosome contribution limited to one gene, *Sry*. Testis size in XOSry,*Eif2s3x* males was similar to that of X<sup>E</sup>OSox9 males but smaller than in XY or X<sup>E</sup>OSry (Fig. S3). In all males examined (13/13) the spermatogonial proliferation block was overcome and spermatogenesis progressed through meiosis up to step 7 of spermatid development (Fig. S4C). The spermatogonia/Sertoli cell ratio was similar to that observed in X<sup>E</sup>OSry (Fig. 1D, Table S2). Round spermatids, however, were dramatically depleted, with spermatid/Sertoli cell ratio 10- and 88-fold lower than in X<sup>E</sup>OSry and XY, respectively (Fig. 1E, Table S2). Out of 31 XOSry,*Eif2s3x* males that provided testes for Assisted Reproductive Technology (ART) trials 17 had round spermatids identifiable in testicular cell suspension; these cells were used for injections followed by embryo transfer. Live offspring were obtained from 16 males, with an efficiency comparable to that obtained with XY control (22.5% vs. 25%, Table 1). We conclude that overexpression of *Eif2s3x* can substitute for the lack of *Eif2s3y* and initiate spermatogenesis in the XOSry context. Moreover, our data suggest that the role of *Eif2s3x/y* during spermatogenesis is not limited to spermatogonial proliferation but extends to meiotic progression.

#### Spermatogenesis and germ cell function in males with no Y chromosome DNA.

Having demonstrated that functional substitutions of *Sry*-to-*Sox9* and *Eif2s3y*-to-*Eif2s3x* are possible, and males with single Y chromosome genes (either *Sry* or *Eif2s3y*) can produce haploid gametes and yield live offspring, we tested whether spermatogenesis can take place in males with a complete absence of Y chromosome genes. The testes from XOSox9,*Eif2s3x* males were smaller than those from the other genotypes (Fig. S3) and were variable in morphology, with the minority of males (13/48, XOSox9,*Eif2s3x*) having relatively normal testes, except for their reduced size and roundish rather than oval shape (Fig. S5B,D,F), and the remaining males (35/48, XOSox9,*Eif2s3x*-alt) having severely disfigured testes with patchy discoloration throughout, an abundance of interstitial tissue, and a low number of seminiferous tubules essentially devoid of germ cells, except for a few spermatogonia (Fig. S5C,E,G). These latter testes likely developed from ovotestes as they showed an elevated expression of ovarian markers, *FoxL2*, *Rspo1*, and *Wnt4* (Fig. S5H-J). Spermatogonial proliferation arrest was overcome in testes from all examined XOSox9,*Eif2s3x* males (10/10), and spermatogenesis progression was comparable to that of XOSry,*Eif2s3x* males (compare Fig. S2C and Fig. 1C), with a spermatogonia/Sertoli cell ratio similar to that of X<sup>E</sup>OSry, and a very significant depletion of round spermatids (Fig. 1DE, Table S2). In ART trials, 13 males had round spermatids which were used for injections, and yielded zygotes with two well-developed



pronuclei, which subsequently cleaved to normal 2-cell embryos (Fig. S6A-C; Movie S1). Embryos from 11 males were used for transfer, 10 resulted in pregnancy, and 9 yielded offspring (20.7%, Table 1). Among the males that yielded progeny there were F1, F2, and F3 generation ROSI offspring derived from the first  $XO^{Sry}, Eif2s3x$  male to produce round spermatids (Fig. S6D). The data support that males entirely devoid of the Y chromosome genes are able to produce haploid gametes and yield progeny when these cells are used for assisted fertilization. However, simultaneous *Sry*-to-*Sox9* and *Eif2s3y*-to-*Eif2s3x* substitutions lead to problems with both testis development and spermatogenesis initiation so that only a subset of  $XO^{Sox9}, Eif2s3x$  males were able to sire offspring with the help of ART.

#### Progeny from males with a single or with no Y chromosome genes are healthy and normal.

Altogether, 18, 46, and 41 offspring were produced from  $X^E O^{Sox9}$ ,  $XO^{Sry}, Eif2s3x$ , and  $XO^{Sox9}, Eif2s3x$ , respectively. All ROSI offspring were genotyped and the genotypes and their frequency met expectancy (Fig. S7A-C). Some offspring from  $XO^{Sox9}, Eif2s3x$  males were assayed for presence of Y chromosome genes, and none were present, as expected (Fig. S7D). ROSI progeny were delivered as normal and healthy pups (Fig. S8A). Some of them were maintained for more than 20 months and remained healthy into old age (Fig. S8B). All male progeny were expected to be infertile due to their sex chromosome gene content and thus were not bred. Female progeny were efficient and successful breeders (Fig. S8C-E). ROSI offspring derived from  $X^E O^{Sox9}$ ,  $XO^{Sry}, Eif2s3x$  and  $XO^{Sox9}, Eif2s3x$  males were weighed monthly from 3 to 8 months of age (Fig. S8F&S9AB). Two controls were 'XY mating' (B6D2F1 mice derived by mating) and 'XY ROSI' (ROSI offspring derived from wild-type males). Overall, ROSI offspring from  $X^E O^{Sox9}$ ,  $XO^{Sry}, Eif2s3x$ , and  $XO^{Sox9}, Eif2s3x$  males gained weight similarly to controls. The only exception was female offspring derived from  $X^E O^{Sox9}$  males, which had significantly increased body weight. This group had the smallest number of mice analyzed which we suspect might have led to this result. Since it has been reported that X chromosome univalence is associated with decreased body weight in females (33), we defined the genotypes of all ROSI offspring subjected to body weight analysis (Table S3). To see if the number of X chromosomes influences our data, we compared body weight of XX vs. XO and  $XXEif2s3x$  vs.  $XOEif2s3x$  ROSI-derived females (Fig. S9CD). Although there was a trend for the average body weight of XX and  $XXEif2s3x$  females being higher than that of XO and  $XOEif2s3x$ , respectively, the differences between the groups at each given age were not statistically significant.

#### Relationship between spermatogenesis and *Eif2s3* transcript expression.

Males carrying the *Eif2s3x* transgene had significantly depleted round spermatid number when compared to the *Eif2s3y* transgenics (Fig. 1E, Table S2). This suggests that *Eif2s3y* and *Eif2s3x* genes may differ functionally and/or the observed variability of spermiogenic phenotypes is due to the differences in the global level of *Eif2s3* genes/transgenes. In order to relate spermatogenesis progression to *Eif2s3x/y* expression, we independently quantified *Eif2s3x*, *Eif2s3y*, and both, in mice of interest (Fig. 2A-C). Mice transgenic for *Eif2s3y* and for *Eif2s3x* had their respective transgenic transcript levels significantly elevated when compared to XY (Fig. 2A,B). The drop in fold

overexpression in males transgenic for *Eif2s3x* (compare Fig. 2B and C) was due to *Eif2s3y* transcripts being ~5-7-times more abundant than *Eif2s3x* in wild-type testes (11) and was not present when the data were normalized to *XOSry* (Fig. S10). The higher global *Eif2s3x/y* expression in  $X^E OSry$  and  $X^E OSox9$  is consistent with the higher incidence of round spermatids in these males (relate Fig. 2C to Fig. 1E). However, such elevated *Eif2s3x/y* expression is clearly not essential for normal spermatogenesis since the levels of *Eif2s3x/y* in XY males were lower than in either transgenic model, raising the question of how spermatogenesis would progress in the XO context with fewer transgenic copies of either *Eif2s3y* or *Eif2s3x*. For the *Eif2s3y* transgenics, we had only one line available, with 10 copies of the transgene (34). However, among the *Eif2s3x* transgenics, mice from lines Tg2&6 carried a single copy of the transgene (Fig. S2B) and had lower *Eif2s3x* expression in the XY context (Fig. S2A). We therefore placed these *Eif2s3x* transgenes in the *XOSry* context, and examined testes from the resulting *XOSry,Eif2s3x* males (Tg2&6). No differences in spermatogonia/Sertoli cell ratio were observed but round spermatids were only found in Tg1 males in which *Eif2s3x* transcript levels are 2.4-2.9-fold higher than in Tg2&6 males (Fig. 2D-F, S4D-G). Altogether these data support that *Eif2s3x* can functionally replace *Eif2s3y* role during spermatogenesis but only if sufficiently overexpressed. We also conclude that in males lacking the Y chromosome spermatogonial proliferation and spermatogenesis initiation can efficiently take place within a broad window of *Eif2s3x/y* expression. However, progression through meiosis is more sensitive and requires higher *Eif2s3x/y* transcript levels.

One issue of concern was that the *Eif2s3x*-derived retroposons, *Gm2223* or *Eif2s3x-ps1*, might influence our analyses. These retroposons are described as pseudogenes in MGI, and there are no ESTs corresponding to them in the databases. Nevertheless, the X retroposon, *Gm2223*, is almost identical (2 nucleotide differences) to *Eif2s3x* and the primers used to quantify *Eif2s3x* and *Eif2s3x/y* expression (Fig. 2B,C&F, Fig. S10) would also amplify transcripts from *Gm2223*. To evaluate the contribution of *Gm2223* to transcript levels measured with our assays, we exploited the fact that neither *Gm2223* nor *Eif2s3x-ps1* includes the first coding exon of *Eif2s3x*, and used primers from the first exon of *Eif2s3x* to amplify *Eif2s3x* specifically (Fig. S11). We obtained very similar results to assays that would detect transcripts from *Eif2s3x* and *Gm2223* (compare Fig. 2B to Fig. S11A, Fig. S10B to Fig. S11B, and Fig. 2F to Fig. S11C); very slight differences were most likely due to the decreased number of males for certain genotypes. Because the expression levels did not vary between the two assay types, we conclude that *Gm2223* is either not expressed or is expressed at lower levels than *Eif2s3x* in testis. This conclusion was further strengthened by our sequence analysis across the nucleotide difference between *Eif2s3x* and *Gm2223* which revealed no traces of *Gm2223* (Fig. S12). We conclude that *Gm2223* transcripts can effectively be discounted in the interpretation of our expression data.

#### *Sry/Sox9* and *Eif2s3y/Eif2s3x* gene pairs in humans

Transgenic activation of *Sox9* is one of many examples of an alternative pathway driving sex determination. Manipulation of expression of other genes from the SOX family (*Sox3*, *Sox8*, and *Sox10*) as well as other genes (e.g. *Dax1*, *Dmrt1/2*, *Rspo1*, *Fgfr2*, *FoxL2*, *Cbx2*, *Map3k1/4*, *Igfr1*, and other) have been shown to result in the sex fate change (reviewed in (6-8)). Disorders of sex development (DSD) in humans involve

mutations of many of the aforementioned genes (reviewed in (35)) implying that sex determination pathways and players are for the most part conserved. However, in humans, these mutations are almost exclusively associated with sterility.

*Eif2s3y* is conserved on the Y chromosome in eutherians but is not present in simian primates, including humans (32). Considering its important role in spermatogenesis how do species lacking *Eif2s3y* handle the loss? Of potential interest in this regard the human Y chromosome retains EIF1AY whose homologue on the X chromosome is involved in the same aspect of translation initiation as EIF2S3X, the loading of the initiator ternary complex to the 40S ribosomal subunit. EIF1AY is lost, together with KDM5D, RPS4Y2 and RBMY1 from the Y chromosome in cases of *AZFb* deletion and its loss is associated with meiotic maturation arrest. Comparative gene mapping studies have provided evidence that Y gene loss can be compensated by gene transposition to an autosome, and that this mechanism is widespread among mammals (14). A *EIF2S3* copy with testis specific expression was identified in human (32) and in several primates, with the phylogenetic analysis indicating that the *EIF2S3* retrogenes originate from the X chromosome and arose independently at least 3 times during evolution indicating strong purifying selection (14). In the Japanese spiny rat, which has lost its Y chromosome, four ancestral Y chromosome genes, including *EIF2S3Y*, have been identified in the genome, transposed either to X or to an autosome (36, 37).

#### Future work

To further understand the roles of *Eif2s3y* and *Eif2s3x* in spermatogenesis and their functional equivalence the following strategies could be utilized: (1) generation of *XOSry* mice expressing lower levels of *Eif2s3y* and higher levels of *Eif2s3x* so that both types of transgenics are more comparable; (2) transgenic rescue experiments in mice engineered to have *Eif2s3y* or *Eif2s3x* independently inactivated in male germ cells. The latter would involve replacement of *Eif2s3x* with *Eif2s3y*. In respect to sex determination, investigations of the processes taking place during the sex determination window in the genotypes used in this study would clarify the interplay between the sex determinants (*Sry* and *Sox9*) and the *Eif2s3x/y* genes, although the distinct transcript levels from the *Eif2s3y* and *Eif2s3x* transgenes might be a limitation.

#### Acknowledgements

The authors are grateful to numerous students who helped with mouse genotyping, to Guy Longepied for technical assistance with the *Eif2s3x* transgene construct, and to Paul Burgoyne for sharing unpublished data on spermatogenesis in *XOSry* transgenic for *Eif2s3x/Klh15*, insightful discussions on the data generated in this project, and overall support. Histological sections were prepared by JABSOM Histology Core supported by NIH grants NNCRR 5 G12 RR003061-26 and NIMHHD 8 G12 MD007601-26. Pronuclear injections were done by IBR Transgenic Core supported by NIH P20GM103457.

A

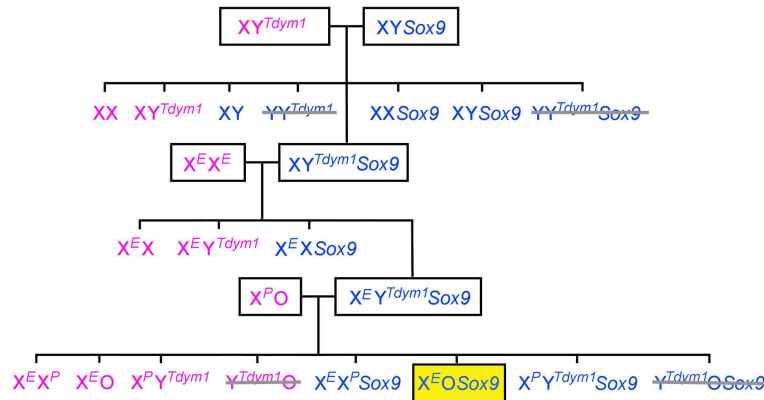

B

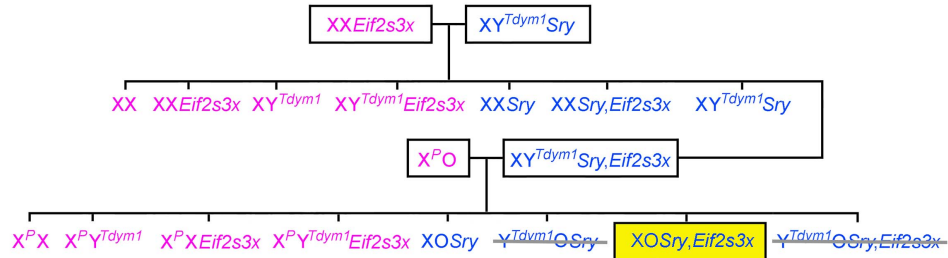

C

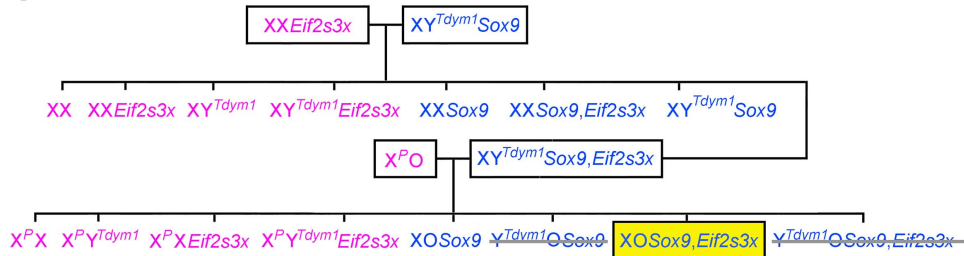

**Fig. S1.**

**Breeding schemes.** The breeding themes applied to produce males of interest, shown in yellow filled boxes:  $X^E O Sox9$  (A),  $XO Sry, Eif2s3x$  (B) and  $XO Sox9, Eif2s3x$  (C) are shown. Females are depicted in pink and males in blue font. X and Y represent normal sex chromosomes.  $X^E$  is an X chromosome carrying the *Eif2s3y* transgene.  $X^P$  is an X chromosome carrying the coat marker *Patchy-fur*.  $Y^{Tdy1}$  is a Y chromosome with *Sry* deleted. *Eif2s3x*, *Sry*, *Sox9* represent autosomally encoded transgenes. The offspring from the crosses were recognized by a combination of genotyping methods involving PCR, qPCR, testis size and fur appearance. Crossed genotypes do not survive to birth. For further explanation on mouse genotypes see Supplementary Material (Material and Methods; Animals).

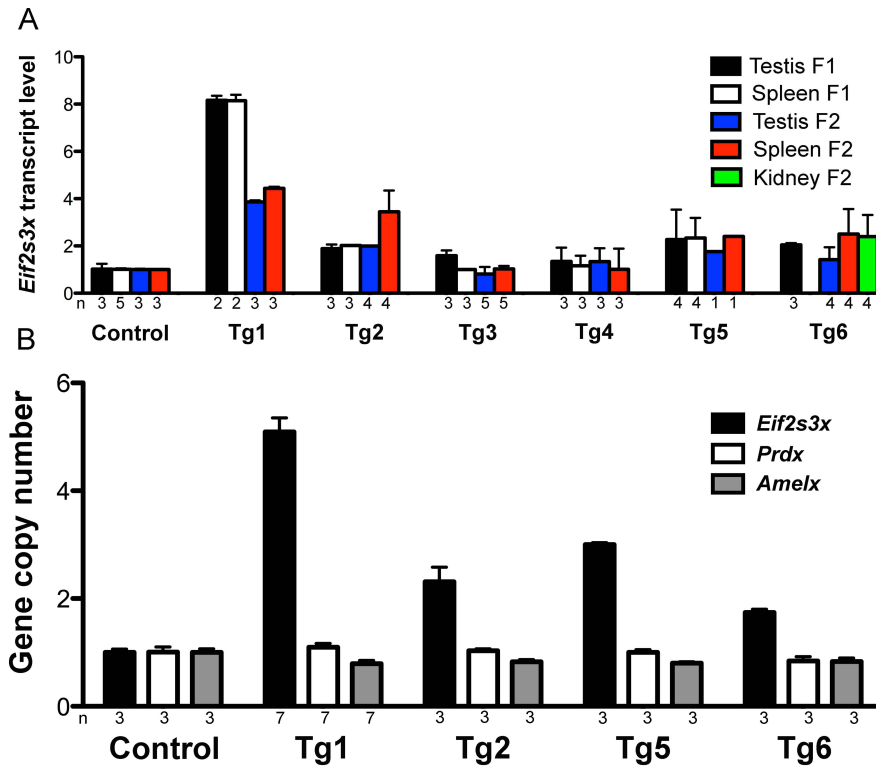

**Fig. S2**

***Eif2s3x* transcript levels and transgene copy number in XY*Eif2s3x* males.** (A) Pronuclear microinjection with *Eif2s3x* transgene resulted in 6 founders (F0, Tg1-6), which transmitted the transgene to next generations (F1 & F2). XY*Eif2s3x* transgenic males provided tissues (testis, spleen or kidney) for *Eif2s3x* transcript level quantification by real-time PCR, with *Actb* as a loading control, and primers recognizing both the endogenous and the transgenic *Eif2s3x*, and the *Eif2s3x* X-linked retroposon *Gm2223*. The controls were non-transgenic XY siblings. Values are mean  $\pm$  SEM. The number of males examined is shown under each bar. *Eif2s3x* transcript levels remained at the level comparable to controls in lines Tg3&4, were slightly elevated in lines Tg2,5&6, and were strongly elevated in line Tg1. (B) *Eif2s3x* transgene copy number was assessed by quantitative PCR after amplification of three single copy X chromosome genes *Eif2s3x*, *Amelx* and *Prdx4*, with *Atr* used for normalization. The primers for detection of *Eif2s3x* were designed to recognize both endogenous and transgenic copies but did not recognize the *Gm2223*. Controls were non-transgenic XO females, in which only one copy of all genes was expected. Tg1, 2, 5 & 6 are XOSry and XO mice transgenic for *Eif2s3x*. All transgenic mice had a single copy of *Prdx* and *Amelx*, as expected. Transgenic lines Tg2 and Tg6 were scored as having 2 copies (1 endogenous and 1 transgenic), Tg5 showed 3 copies (1 endogenous and 2 transgenic), and Tg1 showed 5 copies of *Eif2s3x* (1 endogenous and 4 transgenic). The final gene copy number was established using a typical mathematical rounding, i.e. readout  $<1.5$  was scored as 1 and readout  $\geq 1.5$  as 2. Values are mean  $\pm$  SEM, with number of males examined shown under each bar.

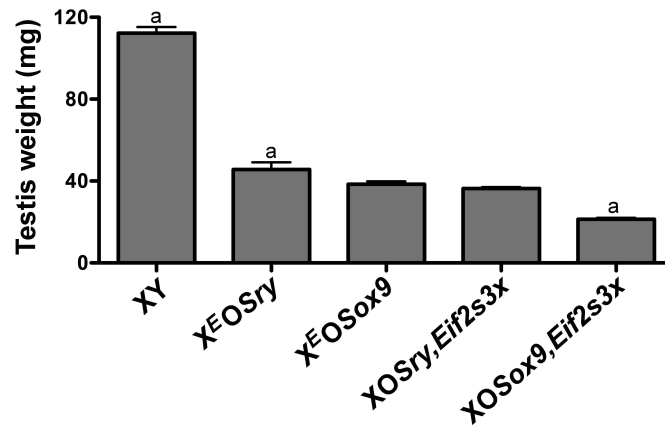

**Fig. S3**

**Testis weight in males with limited or no Y gene contribution.** Four types of males with limited or no Y gene complement (tested; X<sup>E</sup>OSry, X<sup>E</sup>OSox9, XOSry,Eif2s3x and XOSox9,Eif2s3x) were compared to wild-type XY males (control). Graph bars represent the average testis weight, with n=8, 6, 20, 80, 106 testes for XY, X<sup>E</sup>OSry, X<sup>E</sup>OSox9, XOSry,Eif2s3x and XOSox9,Eif2s3x, respectively. Statistical significance (t-test): <sup>a</sup> different than all others at P<0.05. Error = SEM

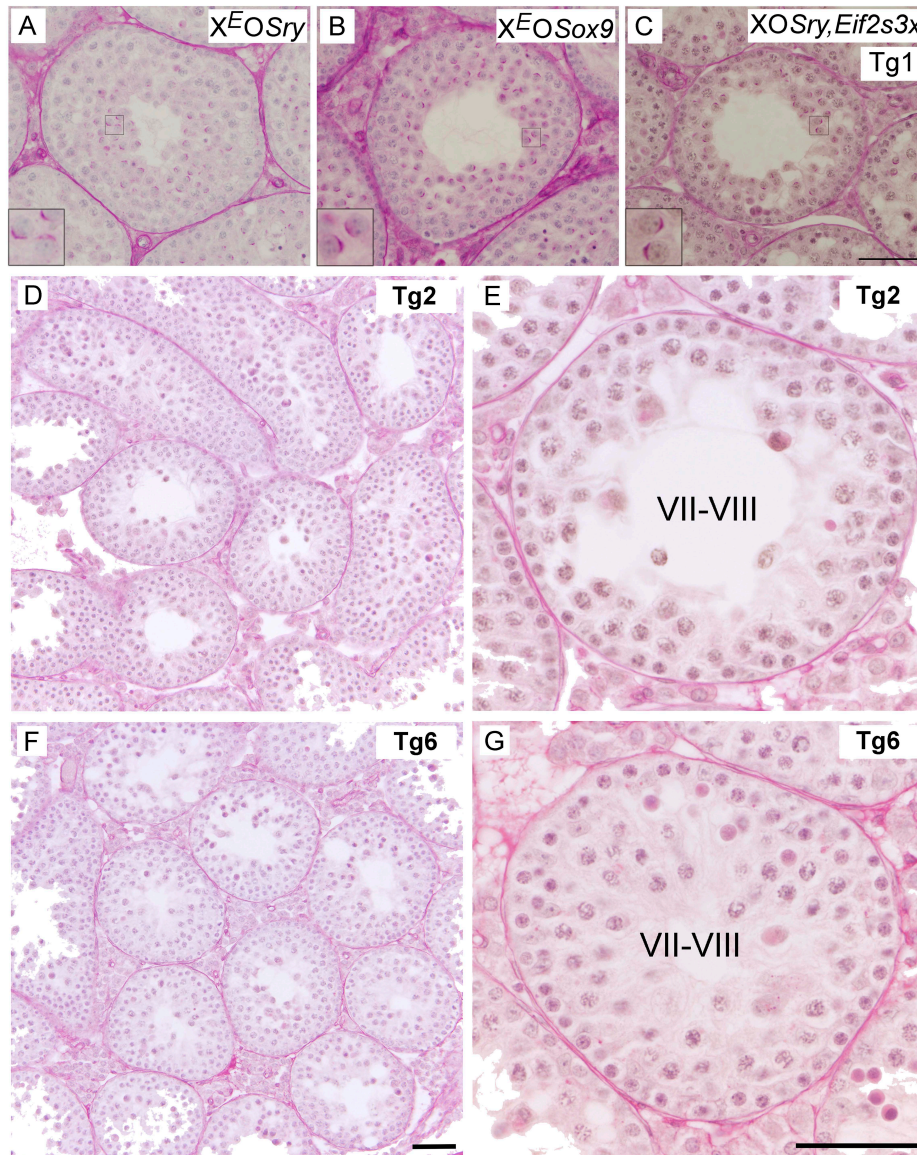

**Fig. S4**

**Testis histology analysis.** (A-C) Exemplary tubules of PAS-H stained sections of testis from males with limited Y gene complement (A)  $X^E OSry$ , (B)  $X^E OSox9$ , (C)  $XO Sry, Eif2s3x$ . All males have meiotic and postmeiotic arrests that occasionally allow formation of round spermatids (insets), arresting at step 7. All tubules are of stage VII-VIII. (D-G) Exemplary tubules of PAS-H stained sections of testis from  $XO Sry, Eif2s3x$  males with lower number of transgene copies, Tg2 (D&E) and line Tg6 (F&G). Spermatogonial proliferation arrest was overcome and spermatogenesis was initiated (D&F) but contradictory to line Tg1 (C), no round spermatids could be found (E&G). Scale bar, 50  $\mu$ m, insets, x3 magnification.

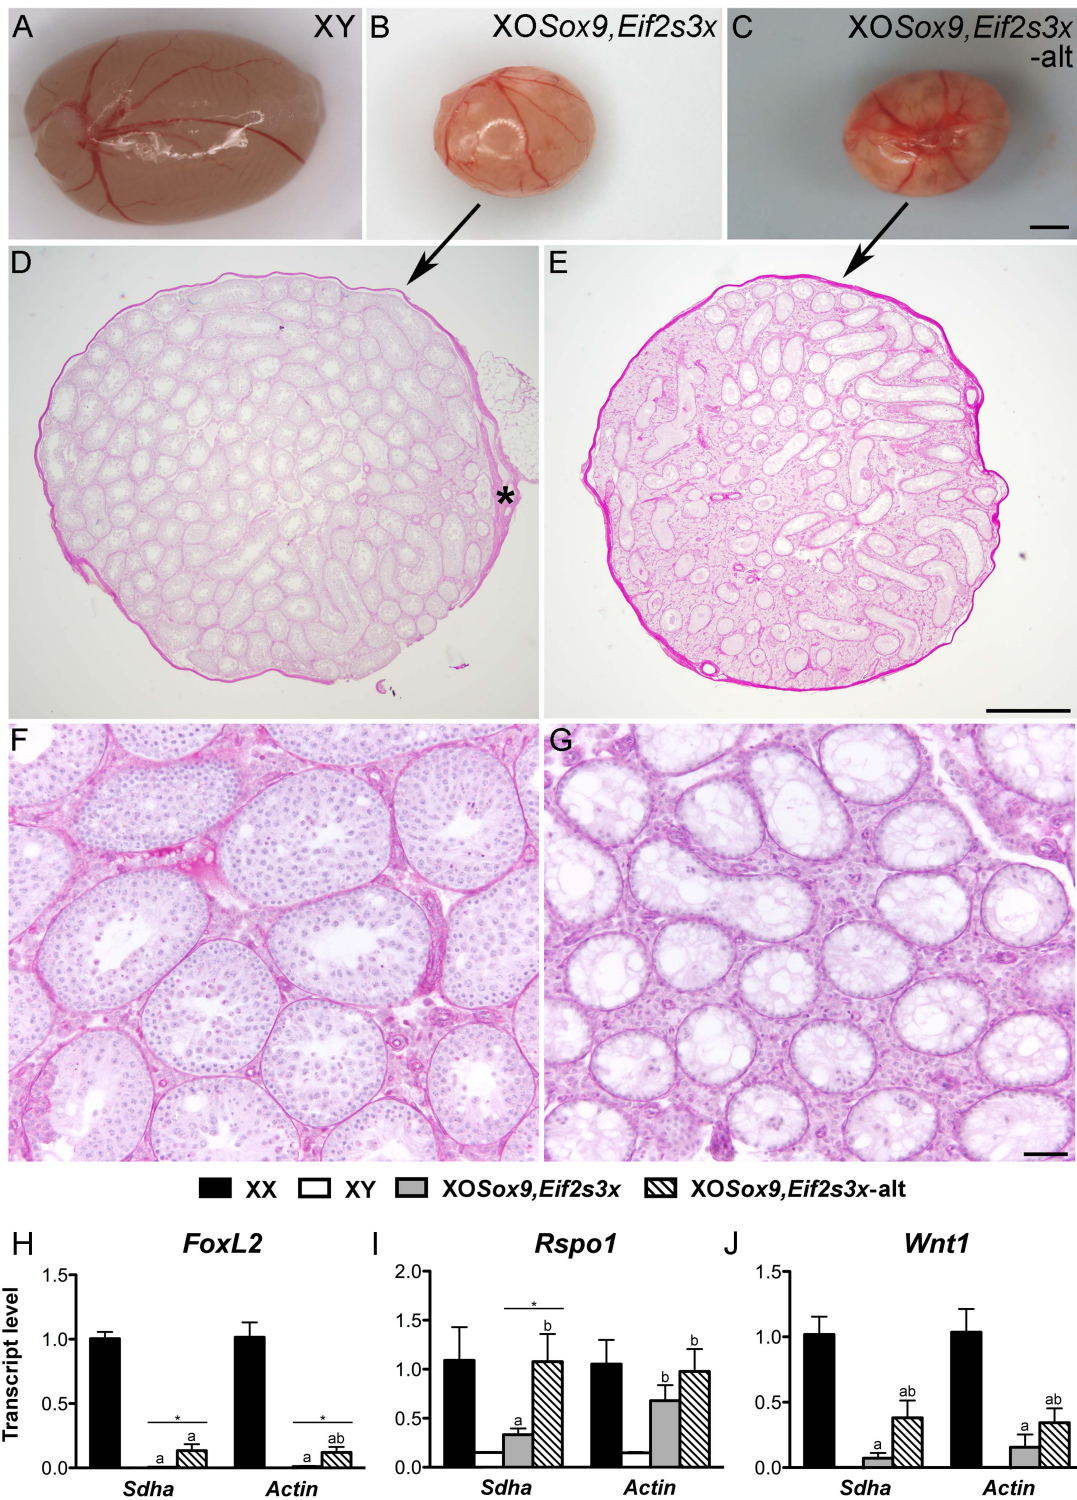

**Fig. S5**

**Testis defects in XO Sox9, Eif2s3x males.** Morphology of the testis from a wild-type male with an intact Y chromosome (XY; **A**) and males with no Y chromosome genes (XO Sox9, Eif2s3x; **B**&**C**). **D**&**E** are the panoramics of cross sections of testes shown in **B**



and C, respectively. \* in D marks the region underlying and adjacent to coelomic artery, in which there is abundance of interstitial tissue and poor tubule formation. In E these defects are extremely severe and appear throughout the cross-section. The male whose testis is shown in B&D represents *XO Sox9, Eif2s3x* males, in which the seminiferous tubules contain germ cells indicative of ongoing spermatogenesis (**F**). The male whose testis is shown in C&E represents *XO Sox9, Eif2s3x-alt* males, in which the seminiferous tubules resemble those of *XO Sry*, with few spermatogonia present and no spermatogenesis (**G**). Scale is 1 mm (A-C, shown in C) and 500  $\mu$ m (D&E, shown in E), and 50  $\mu$ m (F&G, shown in G). (**H-J**) Transcript levels of ovary-specific genes in testes from *XO Sox9, Eif2s3x* males. Testes were obtained from two groups of males with no Y gene complement, *XO Sox9, Eif2s3x* representing males with ongoing spermatogenesis (see B,D,F) and *XO Sox9, Eif2s3x-alt* with abnormal testes and no spermatogenesis (see C,E,G). Ovaries from wild-type females (XX) and testes from wild-type males (XY) served as controls. Transcript levels of *FoxL2* (**H**), *Rspo1* (**I**) and *Wnt4* (**J**) were quantified by real-time PCR, with *Actb* or *Sdha* as loading controls. Values are mean  $\pm$  SEM, with n=3-4 males per group, Statistical significance (t-test, P<0.05): <sup>a</sup> different than XX, <sup>b</sup> different than XY, \* P<0.05.

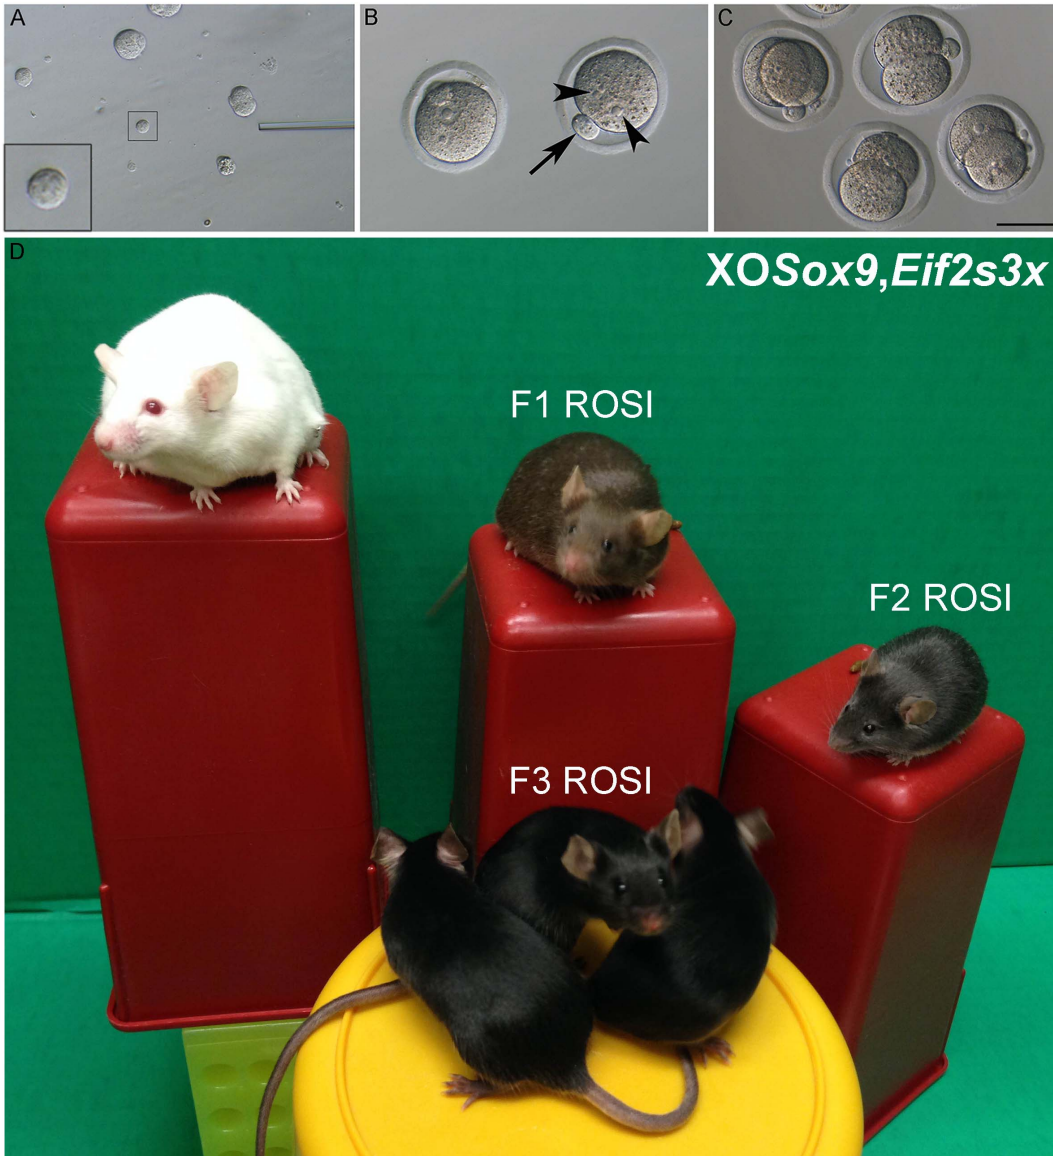

**Fig. S6**

**Round spermatid injection (ROSI) with spermatids from males with a single or no Y chromosome genes.** (A) Example of testicular cell suspension from *XO $Sox9$ ,Eif2s3x* male, with injection pipette visible on the right and inset (x3 magnification) showing a single round spermatid; (B) 6 hours after injection the oocytes developed two pronuclei (arrowheads) and extruded a second polar body (arrow). (C) 24 h after injection fertilized oocytes cleaved and became 2-cell embryos. Scale, 50  $\mu$ m. (D) Three generations of *XO $Sox9$ ,Eif2s3x* males derived with ROSI. The albino male was the first *XO $Sox9$ ,Eif2s3x* male, generated by breeding, who successfully sired first ROSI offspring. His *XO $Sox9$ ,Eif2s3x* son (F1 ROSI) then sired *XO $Sox9$ ,Eif2s3x* (F2 ROSI), which then subsequently sired *XO $Sox9$ ,Eif2s3x* (F3 ROSI). All males had no Y chromosome genes.

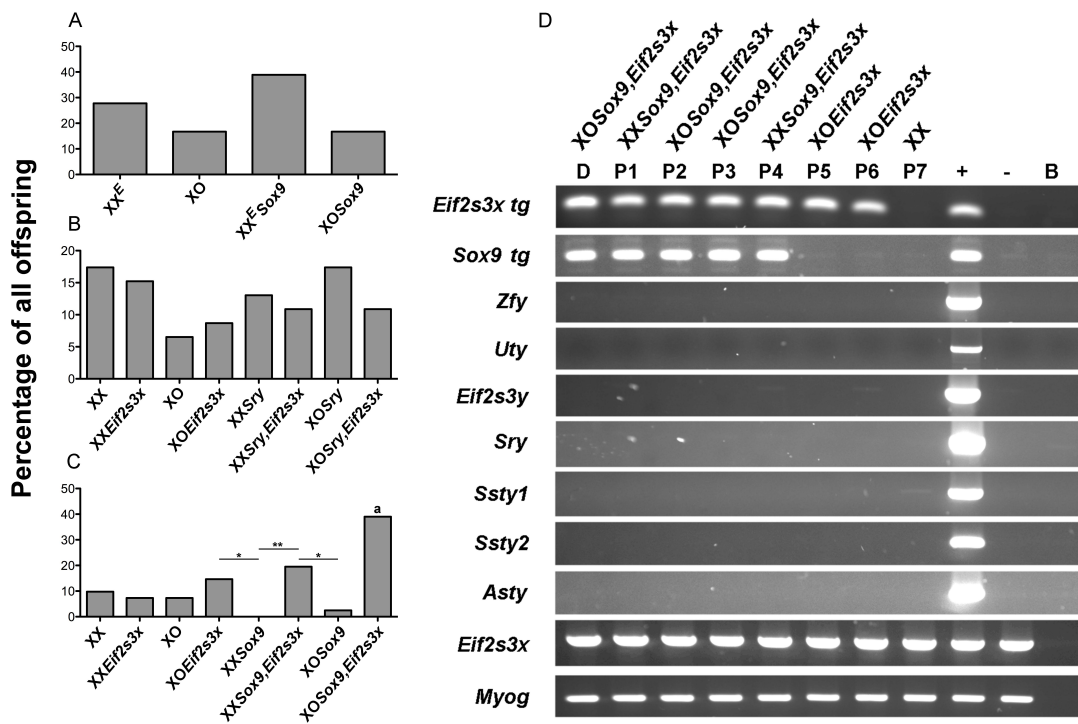

**Fig. S7**

**Genotypes of progeny obtained after ROSI with spermatids from males with 1 or no Y genes.** Progeny obtained after ROSI from  $X^E OSox9$  (A),  $X OSry, Eif2s3x$  (B), and  $X OSox9, Eif2s3x$  (C) males were genotyped with PCR and qPCR. The expected progeny genotypes are 4, 8 and 8 for  $X^E OSox9$ ,  $X OSry, Eif2s3x$ , and  $X OSox9, Eif2s3x$  males, respectively. All expected progeny genotypes were obtained from  $X^E OSox9$  and  $X OSry, Eif2s3x$  males, and were evenly distributed. Among the progeny obtained from  $X OSox9, Eif2s3x$  one expected genotype ( $XX Sox9$ ) did not appear and the male progeny genotypes were not evenly distributed. Number of progeny genotyped was  $n=18$ ,  $n=46$ ,  $n=41$  for A, B, and C, respectively. Statistical significance (Fisher's Exact Test): <sup>a</sup> different than all other except  $XX Sox9, Eif2s3x$ ; \*  $P<0.05$ ; \*\*  $P<0.01$  (D) The exemplary results of the genotyping of the progeny obtained after ROSI from  $X OSox9, Eif2s3x$  male. D =  $X OSox9, Eif2s3x$  male dad, which provided round spermatids for ROSI. P1-P7 = ROSI offspring derived from D. +, -, and B are positive, negative, and blank control, respectively. *Eif2s3x* tg and *Sox9* tg amplify transgenic *Eif2s3x* and *Sox9*, respectively, and not the endogenous copies of these genes. X-encoded *Eif2s3x* and autosomally encoded myogenin (*Myog*) are present in all mice while no Y chromosome genes are present in  $X OSox9, Eif2s3x$  dad and its progeny.

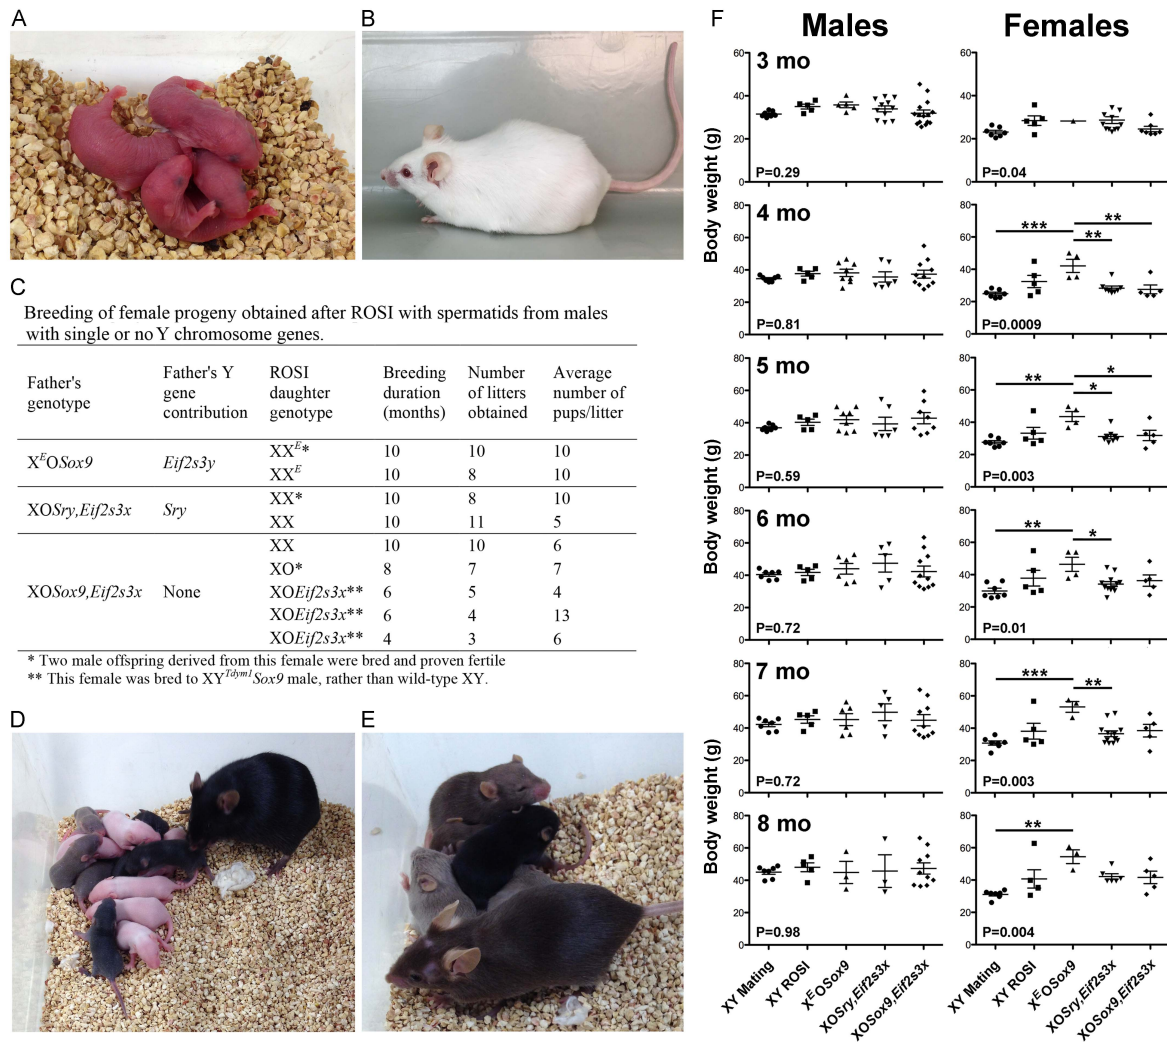

**Fig. S8**

**Progeny from males with a single or no Y chromosome genes.** (A) Newborn pups born after ROSI with spermatids from  $XO Sox9, Eif2s3x$  male. (B) 19 months old ROSI offspring derived from  $XO Sox9, Eif2s3x$  male. (C) The results of breeding of female ROSI offspring. (D & E). Female ROSI offspring derived from  $XO Sox9, Eif2s3x$  male with their own pups. (F) Offspring weights. ROSI offspring derived from  $X^E OSox9$ ,  $XO Sry, Eif2s3x$  and  $XO Sox9, Eif2s3x$  males were weighed monthly from 3 to 8 months of age. Two controls were 'XY mating' (B6D2F1 mice derived by mating) and 'XY ROSI' (ROSI offspring derived from wild-type males). P value in bottom left corner of each graph shows the result of one-way ANOVA analysis and horizontal lines show the differences between individual groups measured by post-hoc Tukey test \*  $P < 0.05$ ; \*\*  $P < 0.01$  (GraphPad Prism). The only group that differed from others were female offspring derived from  $X^E OSox9$  males; this group had the smallest number of mice analyzed.

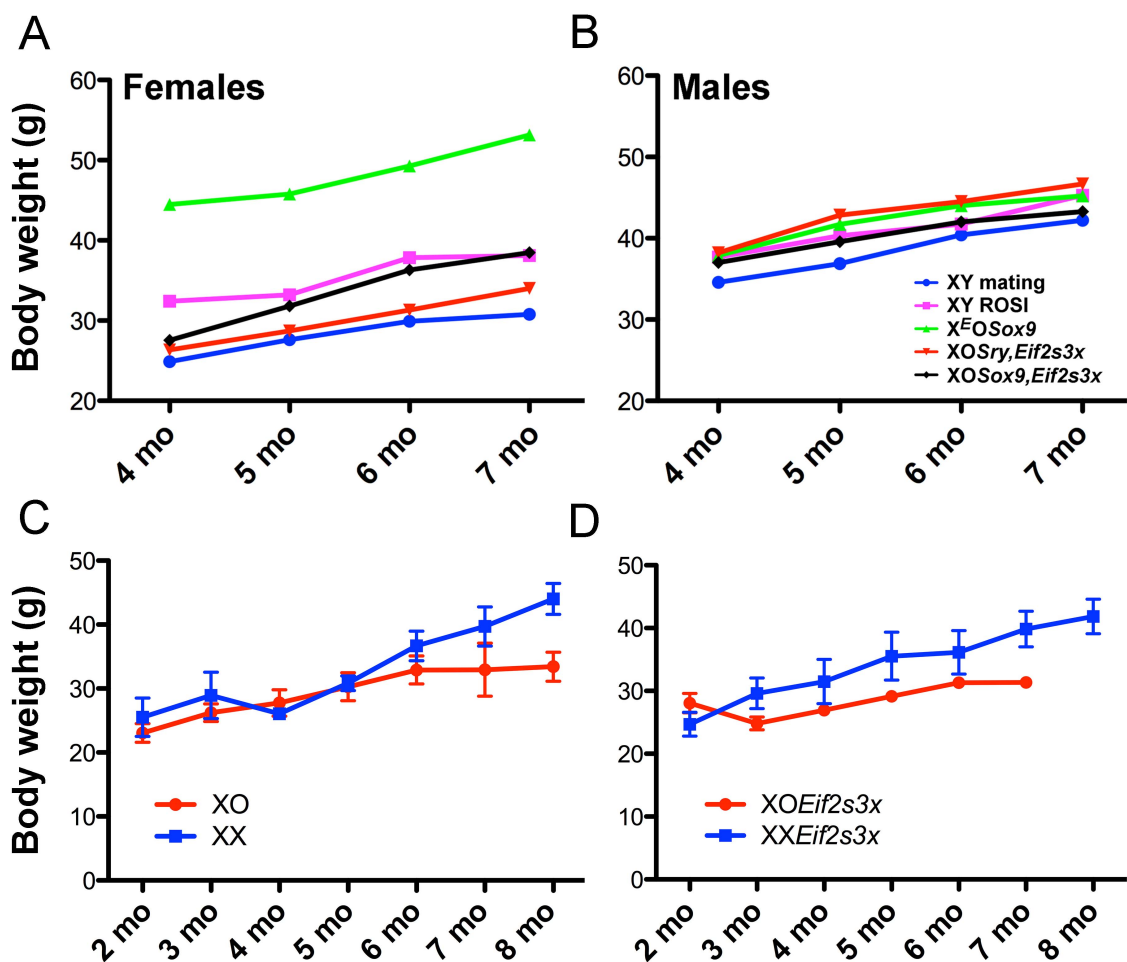

**Fig. S9**

**Offspring growths measured as an increase in body weight over time.** (A-B) ROSI offspring from  $X^E O Sox9$ ,  $XO Sry, Eif2s3x$  and  $XO Sox9, Eif2s3x$  males were weighed monthly from 2 to 8 months of age. The data shown are from mice, for which weights were scored for all examined months (4, 5, 6, and 7). Two control groups were included in the analysis: 'XY mating' are B6D2F1 mice derived by mating. 'XY ROSI' are offspring derived after ROSI with wild-type males. The data were analyzed with two-way ANOVA with age and group as factors, and post-hoc Bonferroni test for multiple paired comparison. Males and females from all groups increased significantly in weight over the examined period (females,  $P=0.0003$ ; males,  $P=0.003$ ; ANOVA, age). There were no differences between the groups of male offspring at any age ( $P=0.345$ , ANOVA, group) but a difference was observed for females ( $P<0.0001$ , ANOVA, group). Post-hoc test demonstrated that female offspring derived from  $X^E O Sox9$  were different from female offspring from 'XY mating' group ( $P<0.001$ ,  $P<0.01$ , and  $P<0.001$ ,  $P<0.0001$ , for months 4,5,6,7 respectively), from  $XO Sry, Eif2s3x$  group ( $P<0.01$ ,  $P<0.05$ , and  $P<0.01$ ,  $P<0.01$ , for months 4,5,6,7 respectively) and from  $XO Sox9, Eif2s3x$  group ( $P<0.05$ , month 4). The number of mice examined for XY mating, XY ROSI,  $X^E O Sox9$ ,  $XO Sry, Eif2s3x$  and  $XO Sox9, Eif2s3x$  groups was 7, 5, 3, 7, 5 (females) and 7, 5, 6, 4, 10 (males), respectively.

All ROSI offspring were derived after injection of spermatids from males on partial (transgenics) or full MF1 (XY) genetic background and oocytes from B6D2F1 females. Error bars are not shown for graph clarity. See Table S3 for information on the genotypes of offspring included in the body weight analyses. **(C-D)** Body weight comparison for female ROSI offspring with one and two X chromosomes. Females derived from *XOSry,Eif2s3x* and *XOSox9,Eif2s3x* males were weighed monthly between 2 to 8 months of age. The data shown represent the comparison of XO vs. XX **(C)** and *XOEif2s3x* vs. *XXEif2s3x* **(D)**. The data were analyzed with two-way ANOVA with age and genotype as factors, and post-hoc Bonferroni test for multiple paired comparison. All mice increased significantly in weight over the examined period (C:  $P < 0.0001$ ; D:  $P = 0.027$ , ANOVA, age), and the effect of genotype was observed (C:  $P = 0.022$ ; D:  $P = 0.021$ , ANOVA, genotype). However, no differences between the genotypes were observed at any age with a post-hoc test, and with an independently performed t-test. Data are shown as mean  $\pm$  SDev, with the number of mice examined: . XO: 5,6,5,5,4,3,2; XX: 5,5,2,2,5,5,4; *XOEif2s3x*: 2,3,3,3,3,3,0; *XXEif2s3x*: 4,4,4,4,6,6,6, for months 2,3,4,5,6,7,8, respectively.

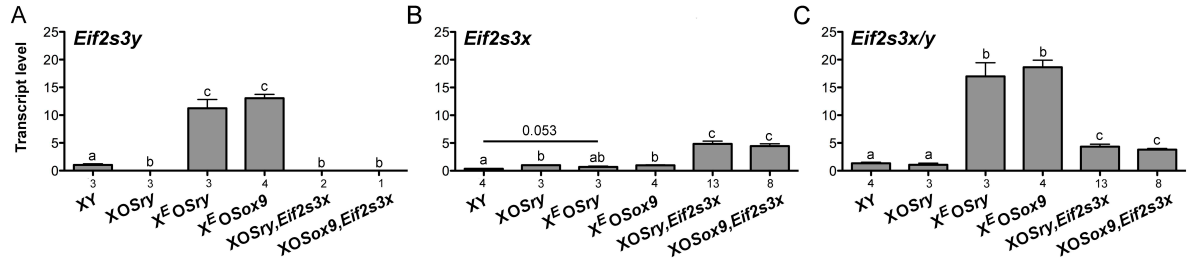

**Fig. S10**

***Eif2s3x/y* expression.** Transcript levels of endogenous and transgenic (A) *Eif2s3y*; (B) *Eif2s3x*; and (C) *Eif2s3x/y*. Transcripts were quantified by real-time PCR with *Actb* as a loading control, and XY (A) and XOSry (B&C) males serving as reference controls. The data in (A) are the same as in Fig. 2A and is shown here for comparison. The data in (B) and (C) are the same as in Fig. 2BC but the normalization here is done with XOSry instead of XY. These data are shown to explain the drop in fold overexpression in males transgenic for *Eif2s3x* (compare Fig. 2B and C), which was due to *Eif2s3y* transcripts being ~5-7-times more abundant than *Eif2s3x* in wild-type testes (11). This drop is not present when the data are normalized to XOSry as shown here. Statistical significance (t-test,  $P < 0.05$ ): bars with different letters are different. Bars are mean  $\pm$  SEM, with n shown under the X axis. The primers used to quantify *Eif2s3x* (B) and *Eif2s3x/y* (C) would amplify any transcripts from the *Eif2s3x* retroposon *Gm2223*.

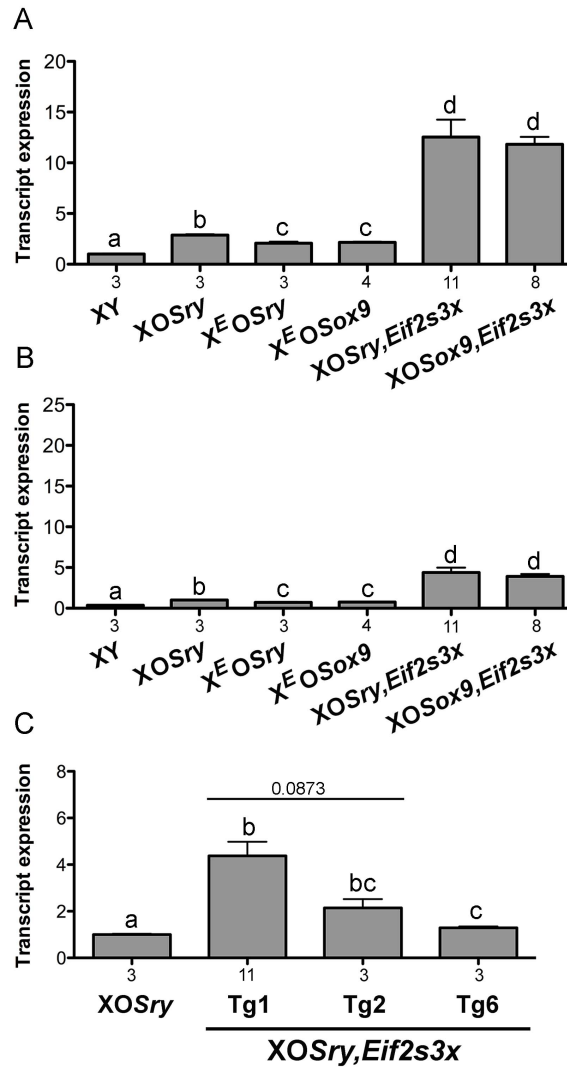

**Fig. S11**

***Eif2s3x* expression.** This analysis was performed with primers recognizing endogenous and transgenic *Eif2s3x* but not the *Eif2s3x* X-linked retroposon *Gm2223*, to estimate the contribution of *Gm2223* to the perceived *Eif2s3x* expression levels. Transcript levels of endogenous and transgenic *Eif2s3x* were quantified by real-time PCR with *Actb* as a loading control, and XY (A) and XOSry (B&C) males serving as reference controls. The data shown in (A), (B), (C) were generated essentially by re-running samples used to generate data shown in Fig. 2B, Fig. S10B, and Fig. 2F, respectively, except that the number of males was decreased for XY (n=3 instead of n=4) and XOSry,*Eif2s3x* Tg1 groups (n=11 instead of n=13 or n=12).

Statistical significance (t-test,  $P < 0.05$ ): bars with different letters are different. Bars are mean  $\pm$  SEM, with n shown under the X axis.



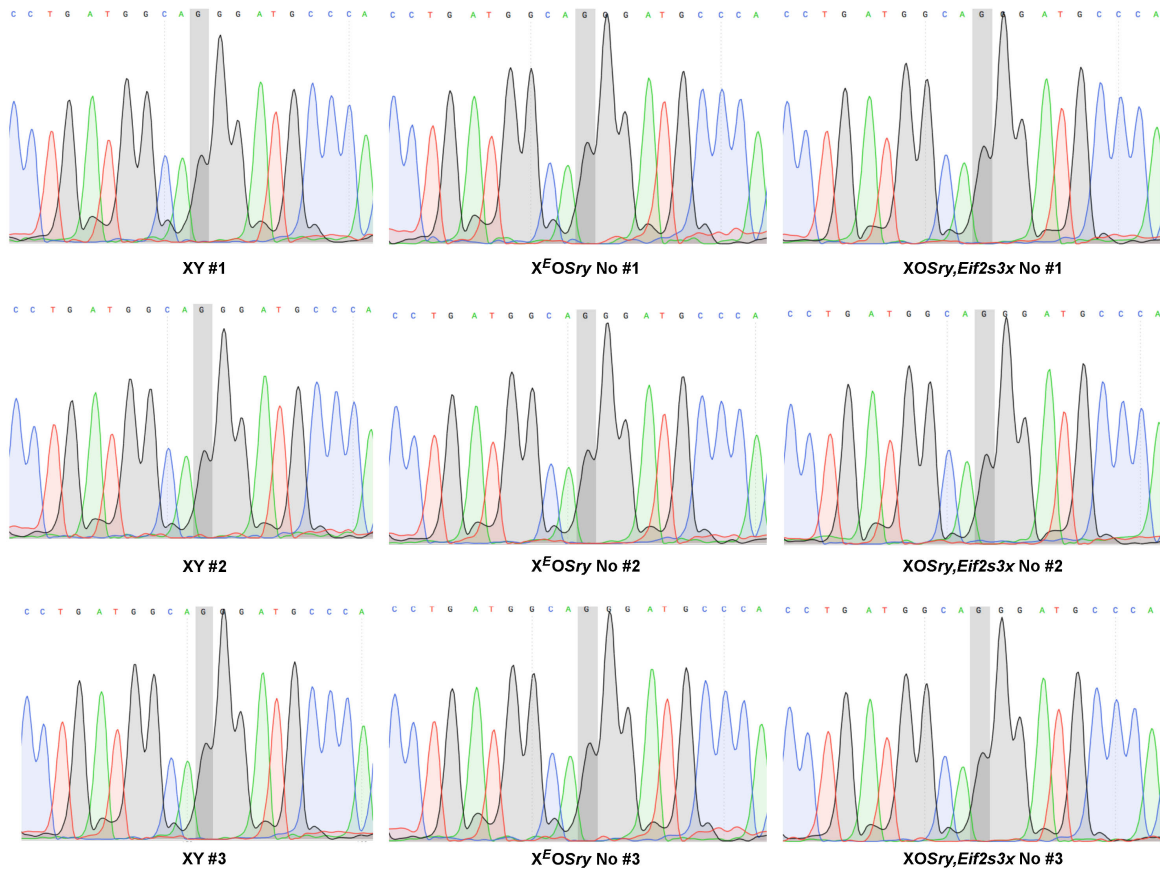

**Fig. S12**

**Sequence analysis.** Sequence analysis of the region encoding the nucleotide difference between *Eif2s3x* (chrX:94190069 G) and *Gm2223* (chrX:33507800 A) was performed on PCR products amplified from testis cDNA of XY, X<sup>E</sup>OSry and XOSry,*Eif2s3x* males (n=3 each). No trace of the A nucleotide at the *Gm2223* genomic locus was observed (grey box). Genome coordinates are from GRCm38/mm10 assembly.

**Table S1.**

Summary characteristics of mice used in the study.

| Male genotype                | Y gene contribution         | Sex determination driver | Spermatogenesis driver    | Spermatogenesis | Haploid round spermatids |
|------------------------------|-----------------------------|--------------------------|---------------------------|-----------------|--------------------------|
| XY                           | Intact Y                    | endogenous <i>Sry</i>    | endogenous <i>Eif2s3y</i> | normal          | frequent                 |
| XO <i>Sry</i>                | <i>Sry</i>                  | <i>Sry</i> transgene     | absent                    | absent          | absent                   |
| X <sup>E</sup> O <i>Sry</i>  | <i>Eif2s3y</i> & <i>Sry</i> | <i>Sry</i> transgene     | <i>Eif2s3y</i> transgene  | impaired        | rare                     |
| X <sup>E</sup> O <i>Sox9</i> | <i>Eif2s3y</i>              | <i>Sox9</i> transgene    | <i>Eif2s3y</i> transgene  | impaired        | rare                     |
| XO <i>Sry,Eif2s3x</i>        | <i>Sry</i>                  | <i>Sry</i> transgene     | <i>Eif2s3x</i> transgene  | impaired        | extremely rare           |
| XO <i>Sox9,Eif2s3x</i>       | none                        | <i>Sox9</i> transgene    | <i>Eif2s3x</i> transgene  | impaired        | extremely rare           |

**Table S2.**

Quantitative analysis of spermatogenesis progression.

| Genotype                  | Spermatogonia/Sertoli cell ratio (mean±SEM)   |                             |                             |                             |                         |                         |                                  |
|---------------------------|-----------------------------------------------|-----------------------------|-----------------------------|-----------------------------|-------------------------|-------------------------|----------------------------------|
|                           | XII-I                                         | II-IV                       | V-VI                        | VII-VIII                    | IX-X                    | XI                      | All stages                       |
| XY                        | 0.41±0.11                                     | 1.42±0.13 <sup>&amp;</sup>  | 2.38±0.61                   | 0.11±0.02                   | 0.20±0.01               | 0.27±0.02 <sup>a</sup>  | <b>0.79±0.08<sup>&amp;</sup></b> |
| <i>X<sup>E</sup>OSry</i>  | 0.30±0.07                                     | 0.79±0.08                   | 1.17±0.44                   | 0.07±0.01 <sup>a</sup>      | 0.08±0.00*              | 0.10±0.01 <sup>b</sup>  | <b>0.41±0.09</b>                 |
| <i>X<sup>E</sup>Osox9</i> | 0.15±0.02 <sup>&amp;</sup>                    | 0.70±0.06 <sup>a</sup>      | 1.15±0.12 <sup>a*</sup>     | 0.02±0.01 <sup>b*</sup>     | 0.07±0.02*              | 0.20±0.02 <sup>a</sup>  | <b>0.39±0.03<sup>a</sup></b>     |
| <i>XOSry,Eif2s3x</i>      | 0.34±0.03                                     | 0.92±0.08 <sup>b</sup>      | 1.45±0.07 <sup>b*</sup>     | 0.05±0.01 <sup>a*</sup>     | 0.12±0.03               | 0.21±0.03               | <b>0.52±0.03<sup>b</sup></b>     |
| <i>XOsox9,Eif2s3x</i>     | 0.28±0.03                                     | 0.94±0.08                   | 1.52±0.13*                  | 0.03±0.00 <sup>b*</sup>     | 0.07±0.01*              | 0.17±0.04               | <b>0.51±0.03<sup>b</sup></b>     |
|                           | Round spermatid/Sertoli cell ratio (mean±SEM) |                             |                             |                             |                         |                         |                                  |
|                           | XII-I                                         | II-IV                       | V-VI                        | VII-VIII                    | IX-X                    | XI                      | All stages                       |
| XY                        | 8.03±0.45 <sup>&amp;</sup>                    | 14.72±2.04 <sup>&amp;</sup> | 12.48±1.08 <sup>&amp;</sup> | 13.21±0.95 <sup>&amp;</sup> | 0                       | 0                       | <b>7.88±0.50<sup>&amp;</sup></b> |
| <i>X<sup>E</sup>OSry</i>  | 0.40±0.02 <sup>&amp;</sup>                    | 1.39±0.45 <sup>a</sup>      | 1.08±0.10 <sup>a</sup>      | 1.43±0.36 <sup>a</sup>      | 0.85±0.13 <sup>a*</sup> | 0.34±0.07 <sup>a*</sup> | <b>0.92±0.15<sup>a</sup></b>     |
| <i>X<sup>E</sup>Osox9</i> | 0.27±0.03 <sup>&amp;</sup>                    | 0.68±0.13 <sup>a</sup>      | 1.01±0.16 <sup>a</sup>      | 0.83±0.16 <sup>a</sup>      | 0.81±0.25 <sup>a</sup>  | 0.50±0.15 <sup>a</sup>  | <b>0.67±0.12<sup>a</sup></b>     |
| <i>XOSry,Eif2s3x</i>      | 0.04±0.02                                     | 0.08±0.04 <sup>b</sup>      | 0.11±0.04 <sup>b</sup>      | 0.16±0.10 <sup>b</sup>      | 0.06±0.02 <sup>b</sup>  | 0.05±0.02 <sup>b</sup>  | <b>0.09±0.04<sup>b</sup></b>     |
| <i>XOsox9,Eif2s3x</i>     | 0.06±0.02                                     | 0.13±0.04 <sup>b</sup>      | 0.24±0.06 <sup>b</sup>      | 0.28±0.06 <sup>b</sup>      | 0.18±0.04 <sup>c</sup>  | 0.13±0.03 <sup>c</sup>  | <b>0.16±0.04<sup>b</sup></b>     |

For each male 10 tubules were examined per stage and the numbers of spermatogonia, round spermatids, and Sertoli cells were counted. The data are expressed as germ cell/Sertoli cell ratios. In wild-type males no round spermatids are present in stages IX-XI so those observed in the remaining genotypes represent 'delayed spermatids'. Statistical significance (t-test): \* different than XY; <sup>&</sup> different than all other; <sup>a,b,c</sup> columns with different superscript letters are significantly different. The number of males per genotype was n=3, 3, 8, 13, 10 for XY, *X<sup>E</sup>OSry*, *X<sup>E</sup>Osox9*, *XOSry,Eif2s3x*, *XOsox9,Eif2s3x*.

**Table S3.**

ROSI offspring body weight data with genotypes of individual mice identified.

| Father's genotype          | ROSI offspring sex     | ROSI offspring genotype    | Body weight (g)        |       |       |       |       |       |       |
|----------------------------|------------------------|----------------------------|------------------------|-------|-------|-------|-------|-------|-------|
|                            |                        |                            | 2 mo                   | 3 mo  | 4 mo  | 5 mo  | 6 mo  | 7 mo  | 8 mo  |
| <i>X<sup>E</sup>O Sox9</i> | Females                | <i>X<sup>E</sup>X</i>      |                        |       | 48.10 | 47.68 | 53.89 | 55.52 | 56.48 |
|                            |                        | <i>X<sup>E</sup>X</i>      |                        |       | 50.12 | 49.77 | 53.95 | 57.41 | 60.64 |
|                            |                        | <i>X<sup>E</sup>X</i>      |                        |       | 35.27 | 39.87 | 40.01 | 46.56 | 46.20 |
|                            |                        | <i>XO</i>                  | 24.90                  | 28.20 | 34.87 | 36.72 | 37.77 |       |       |
|                            | Males                  | <i>X<sup>E</sup>X Sox9</i> |                        |       | 44.44 | 45.80 | 51.41 | 56.17 | 57.82 |
|                            |                        | <i>X<sup>E</sup>X Sox9</i> |                        |       | 34.68 | 39.80 | 39.41 | 40.48 | 42.15 |
|                            |                        | <i>X<sup>E</sup>X Sox9</i> |                        |       | 28.67 | 33.80 | 34.87 | 35.26 | 34.55 |
|                            |                        | <i>X<sup>E</sup>X Sox9</i> | 33.05                  | 40.26 | 46.70 | 50.01 | 52.82 | 52.32 |       |
|                            |                        | <i>X<sup>E</sup>X Sox9</i> | 30.45                  | 36.19 | 39.99 | 46.12 | 49.51 | 51.00 |       |
|                            |                        | <i>X<sup>E</sup>X Sox9</i> | 29.98                  | 32.27 | 32.75 | 34.77 | 36.06 | 36.04 |       |
|                            |                        | <i>X<sup>E</sup>X Sox9</i> | 31.06                  | 35.80 | 43.60 | 49.94 |       |       |       |
|                            | <i>XO Sox9</i>         | 31.16                      | 34.47                  | 34.70 | 35.05 |       |       |       |       |
|                            | <i>XO Sry, Eif2s3x</i> | Females                    | <i>XX Eif2s3x</i>      |       |       |       |       | 25.70 | 36.35 |
| <i>XX Eif2s3x</i>          |                        |                            |                        |       |       |       | 35.15 | 38.92 | 39.41 |
| <i>XX</i>                  |                        |                            |                        |       |       |       | 36.80 | 38.76 | 40.98 |
| <i>XX</i>                  |                        |                            |                        |       |       |       | 44.37 | 49.18 | 50.06 |
| <i>XX</i>                  |                        |                            |                        |       |       |       | 34.83 | 37.10 | 39.43 |
| <i>XX Eif2s3x</i>          |                        |                            |                        |       | 36.80 | 40.41 | 42.85 | 47.75 | 43.75 |
| <i>XO Eif2s3x</i>          |                        |                            |                        | 26.73 | 26.89 | 30.54 | 31.45 | 32.34 |       |
| <i>XO Eif2s3x</i>          |                        |                            |                        | 24.57 | 28.52 | 29.45 | 31.89 | 31.08 |       |
| <i>XX</i>                  |                        |                            |                        | 24.30 | 26.53 | 29.70 | 30.02 | 30.73 |       |
| <i>XO Eif2s3x</i>          |                        |                            |                        | 23.18 | 25.38 | 27.40 | 30.63 | 30.65 |       |
| <i>XX Eif2s3x</i>          |                        |                            |                        | 24.38 | 26.05 | 28.57 | 32.17 | 32.72 |       |
| <i>XO</i>                  |                        |                            |                        | 24.53 | 27.33 | 30.72 | 34.15 | 33.15 |       |
| <i>XO</i>                  |                        |                            | 23.63                  | 26.49 | 29.13 | 32.48 |       |       |       |
| <i>XX</i>                  |                        |                            | 27.28                  | 33.28 |       |       |       |       |       |
| <i>XX</i>                  |                        |                            | 34.40                  | 41.14 |       |       |       |       |       |
| <i>XO</i>                  |                        |                            | 27.25                  | 31.12 |       |       |       |       |       |
| <i>XX Eif2s3x</i>          |                        |                            | 25.07                  | 29.85 |       |       |       |       |       |
| <i>XX Eif2s3x</i>          |                        |                            | 29.87                  | 34.42 |       |       |       |       |       |
| Males                      |                        |                            | <i>XX Sry, Eif2s3x</i> |       |       |       |       | 59.20 | 62.02 |
|                            |                        | <i>XX Sry</i>              |                        |       | 29.15 | 31.64 | 32.15 | 34.57 | 32.75 |
|                            |                        | <i>XX Sry, Eif2s3x</i>     |                        |       | 32.73 | 35.45 | 36.67 | 40.62 | 38.69 |
|                            |                        | <i>XX Sry</i>              |                        | 39.32 | 44.81 | 49.90 | 52.13 | 53.90 |       |
|                            |                        | <i>XO Sry</i>              |                        | 38.54 | 46.20 | 54.42 | 57.07 | 57.63 |       |
|                            | <i>XX Sry, Eif2s3x</i> | 25.96                      | 28.44                  | 30.57 | 31.89 |       |       |       |       |
|                            | <i>XO Sry</i>          | 24.11                      | 27.58                  | 30.45 | 32.49 |       |       |       |       |
|                            | <i>XO Sry</i>          | 28.06                      | 34.32                  |       |       |       |       |       |       |

|                        |         |                 |       |       |       |       |       |       |       |
|------------------------|---------|-----------------|-------|-------|-------|-------|-------|-------|-------|
|                        |         | XXSry           | 28.87 | 33.16 |       |       |       |       |       |
|                        |         | XOSry           | 24.65 | 28.09 |       |       |       |       |       |
|                        |         | XXSry,Eif2s3x   | 27.28 | 31.65 |       |       |       |       |       |
|                        |         | XXSry,Eif2s3x   | 32.66 | 36.71 |       |       |       |       |       |
|                        |         | XOSry,Eif2s3x   | 31.62 | 35.80 |       |       |       |       |       |
|                        |         | XXSry,Eif2s3x   | 33.83 | 39.68 |       |       |       |       |       |
| <b>XO Sox9,Eif2s3x</b> | Females | XOEif2s3x       | 26.51 |       |       |       |       |       |       |
|                        |         | XOEif2s3x       | 29.58 |       |       |       |       |       |       |
|                        |         | XX              | 28.18 |       |       |       |       |       |       |
|                        |         | XO              | 20.11 | 22.23 | 23.70 | 27.71 | 32.43 | 40.03 | 35.68 |
|                        |         | XXEif2s3x       | 21.58 | 22.92 | 26.50 | 32.85 | 36.25 | 34.99 | 42.56 |
|                        |         | XO              | 19.51 | 23.10 | 23.72 | 23.77 | 27.30 | 25.66 | 31.16 |
|                        |         | XX              | 17.45 | 22.32 | 25.62 | 31.99 | 37.34 | 42.77 | 45.60 |
|                        |         | XXEif2s3x       | 22.26 | 31.29 | 38.27 | 42.83 | 48.32 | 48.95 | 53.20 |
|                        | XX      | 20.29           | 23.66 |       |       |       |       |       |       |
|                        | Males   | XXSox9,Eif2s3x  | 32.05 | 42.39 | 46.61 | 53.42 | 57.34 | 60.3  | 62.16 |
|                        |         | XO Sox9,Eif2s3x | 33.80 |       |       |       |       |       |       |
|                        |         | XO Sox9,Eif2s3x | 31.50 |       |       |       |       |       |       |
|                        |         | XXSox9,Eif2s3x  | 32.61 | 45.43 | 54.93 | 59.59 | 63.41 | 63.7  | 66.18 |
|                        |         | XO Sox9,Eif2s3x | 25.89 |       |       |       |       |       |       |
|                        |         | XO Sox9,Eif2s3x | 29.66 |       |       |       |       |       |       |
|                        |         | XO Sox9,Eif2s3x | 26.4  |       |       |       |       |       |       |
|                        |         | XO Sox9,Eif2s3x | 26.47 |       |       |       |       |       |       |
|                        |         | XO Sox9,Eif2s3x | 25.34 |       |       |       |       |       |       |
|                        |         | XO Sox9,Eif2s3x | 23.44 |       |       |       |       |       |       |
|                        |         | XO Sox9,Eif2s3x | 24.31 | 26.58 |       |       |       |       |       |
|                        |         | XO Sox9,Eif2s3x | 23.68 | 25.58 | 28.02 | 32.39 | 35.5  | 37.12 | 40.09 |
|                        |         | XO Sox9,Eif2s3x | 25.60 | 27.01 | 32.49 | 35.33 | 32.73 | 34.20 | 36.30 |
|                        |         | XXSox9,Eif2s3x  | 24.54 | 27.82 | 30.11 | 30.51 | 34.05 | 35.85 | 37.05 |
|                        |         | XO Sox9,Eif2s3x | 25.52 | 27.45 | 32.12 | 32.76 | 31.52 |       |       |
|                        |         | XO Sox9,Eif2s3x | 29.80 | 31.15 | 35.77 | 36.54 | 39.70 | 40.98 | 44.73 |
|                        |         | XO Sox9,Eif2s3x | 28.67 | 31.53 | 36.75 | 37.01 | 37.84 | 38.54 | 41.92 |
|                        |         | XO Sox9,Eif2s3x | 29.23 | 34.65 | 40.01 | 43.37 | 48.63 | 50.07 | 52.46 |
|                        |         | XO Sox9         | 31.02 | 37.01 | 43.31 | 46.69 | 51.74 | 52.21 | 55.05 |
|                        |         | XXSox9,Eif2s3x  | 29.29 | 30.61 | 30.82 | 33.60 | 33.12 | 35.29 | 36.84 |
|                        |         | XXSox9,Eif2s3x  | 20.01 |       |       |       |       |       |       |
|                        |         | XO Sox9,Eif2s3x | 32.18 | 31.17 |       |       |       |       |       |
|                        |         | XXSox9,Eif2s3x  | 30.81 | 32.41 |       |       |       |       |       |
| XO Sox9,Eif2s3x        |         | 27.72           | 27.83 |       |       |       |       |       |       |

The entire body weight data shown here are presented in Fig. S8F. The data shown here in blue font are presented in Fig. S9A.

**Table S4.**  
Primers.

| Gene                                                          | Primer ID               | Primer sequence            | Amplicon | Reference;<br>Used in Figure |
|---------------------------------------------------------------|-------------------------|----------------------------|----------|------------------------------|
| <i>qPCR primers for sex chromosome copy number estimation</i> |                         |                            |          |                              |
| <i>Eif2s3x</i> (sp1)*                                         | <i>Eif2s3x-sp-CNAFP</i> | CAATGTGGCGAGATCCTGTC       | 87 bp    | Current paper;<br>Fig. S2B   |
|                                                               | <i>Eif2s3x-sp-CNARP</i> | CTTTTCTCTCCGAGCAAGATG      |          |                              |
| <i>Prdx</i>                                                   | <i>Prdx4-F</i>          | CATGATATCCACTGAAAGCTAC     | 82 bp    | (38); Fig. S2B               |
|                                                               | <i>Prdx4-R</i>          | GAGACAGTGTATCTATCCCTG      |          |                              |
| <i>Amelx</i>                                                  | <i>Amelx-F</i>          | GTTGGGTTGGAGTCATGGAG       | 162 bp   | (38); Fig. S2B               |
|                                                               | <i>Amelx-R</i>          | GGCTGCACCACCAAATCATC       |          |                              |
| <i>Atr</i>                                                    | <i>Atr-WT L1</i>        | GGGATGTTTACAGCCAGCTC       | 143 bp   | (34); Fig. S2B               |
|                                                               | <i>Atr-WT R1</i>        | AGCCGATTTGCCACAGTAAC       |          |                              |
| <i>Standard genotyping PCR primers</i>                        |                         |                            |          |                              |
| <i>Myog</i>                                                   | <i>Om1a</i>             | TTACGTCCATCGTGGACAGCAT     | 246 bp   | (39); Fig. S7                |
|                                                               | <i>Om1b</i>             | TGGGCTGGGTGTTAGCCTTAT      |          |                              |
| <i>Zfy</i>                                                    | <i>Zfyp1</i>            | AAGATAAGCTTACATAATCACATGGA | 600 bp   | (40); Fig. S7                |
|                                                               | <i>Zfyp2</i>            | CCTATGAAATCCTTTGCTGCACATGT |          |                              |
| <i>Uty</i>                                                    | <i>oMJ274</i>           | AACACAAGTAAAGACTATTCAG     | 850 bp   | (41); Fig. S7                |
|                                                               | <i>oMJ275</i>           | AAGCAGGAAGCTTTGTCAGC       |          |                              |
| <i>Eif2s3y</i>                                                | <i>gESYsF1</i>          | ATAGATCCGGCAGAAGACAAAG     | 843 bp   | Current paper;<br>Fig. S7    |
|                                                               | <i>gESYsR1</i>          | GCCTCAACGAGGTAGAAGAATAG    |          |                              |
| <i>Sry</i> (Y <sup>Tdym1</sup> )                              | <i>Muty3</i>            | GTGTCTCAAAGCCTGCTCTTC      | 204 bp   | (42); Fig. S7                |
|                                                               | <i>MutyRp1</i>          | CATGTACTGCTAGCAGCTATC      |          |                              |
| <i>Ssty1</i>                                                  | <i>Ymtfp1</i>           | CTGGAGCTCTACAGTGATGA       | 342 bp   | (43); Fig. S7                |
|                                                               | <i>Ymtrp1</i>           | CAGTTACCAATCAACACATCAC     |          |                              |
| <i>Ssty2</i>                                                  | <i>Pc11fp2</i>          | GTTTTTCCTCAGGTGAGGGA       | 237 bp   | (42); Fig. S7                |
|                                                               | <i>Pc11rp2</i>          | CAGAGGGGTCTCTGGAATGT       |          |                              |
| <i>Asty</i>                                                   | <i>Asty-F</i>           | GGGAGTAGAACTCATCATC        | 280 bp   | (44); Fig. S7                |
|                                                               | <i>Asty-R</i>           | CAGGAGATGACTAACATAGCA      |          |                              |
| <i>Eif2s3y tg**</i>                                           | <i>EyTspF8</i>          | CAGCTCTGAGGGTGGGTAGTAG     | 782 bp   | Current paper;<br>Fig. S7    |
|                                                               | <i>EyTspR8</i>          | TGACCATGATTACGCCAAGCTAT    |          |                              |
| <i>Sox9 tg**</i>                                              | <i>Sox9-sWTP</i>        | CATCCGAGCCGCACCTCATG       | 300 bp   | (3); Fig. S7                 |
|                                                               | <i>Sox9-SS2</i>         | GCTGGAGCCGTTGACGCG         |          |                              |
| <i>Eif2s3x tg**</i>                                           | <i>pTARBAF7</i>         | GCCTGATGCGGTATTTTCTC       | 87 bp    | (34); Fig. S7                |
|                                                               | <i>pTARBAR7</i>         | CGGCATCAGAGCAGATTGTA       |          |                              |
| <i>Real-time RT-PCR primers</i>                               |                         |                            |          |                              |
| <i>FoxL2</i>                                                  | <i>FoxL2.F</i>          | AGGGAGAGAATAAAACATTCATGG   | 63bp     | (45); Fig. S5H-J             |
|                                                               | <i>FoxL2.R</i>          | GCAAACCTCCAAGGCCATTAC      |          |                              |
| <i>Rspo1</i>                                                  | <i>Rspo1_F</i>          | CGACATGAACAAATGCATCA       | 82bp     | (46); Fig. S5H-J             |
|                                                               | <i>Rspo1_R</i>          | CTCCTGACACTTGGTGCAGA       |          |                              |
| <i>Wnt4</i>                                                   | <i>Wnt4_F</i>           | CGAGGAGTGCCAATACCAGT       | 138bp    | (47); Fig. S5H-J             |
|                                                               | <i>Wnt4_R</i>           | GCCACACCTGCTGAAGAGAT       |          |                              |

|                              |                   |                          |        |                               |
|------------------------------|-------------------|--------------------------|--------|-------------------------------|
| <i>Actb</i>                  | <i>Actb-F</i>     | GGCACCACACCTTCTACAATG    | 352 bp | (48); Fig. S5H-J              |
|                              | <i>Actb-R</i>     | GTGGTGGTGAAGCTGTAGCC     |        |                               |
| <i>Sdha</i>                  | <i>Sdha-F</i>     | TGTTTCAGTTCCACCCAC       | 66 bp  | (49); Fig. S5H-J              |
|                              | <i>Sdha-R</i>     | TCTCCACGACACCCTTCTGT     |        |                               |
| <i>Eif2s3x</i> ***           | <i>Eif2s3x-F2</i> | GGGACCAAAGGGAACCTTCAAG   | 82 bp  | (50); Fig. 2, S10             |
|                              | <i>Eif2s3x-R2</i> | AGCATCGTAGCCATCAAAATATCA |        |                               |
| <i>Eif2s3x</i> (sp2)<br>**** | FpESXsp           | GACAGGATCTCGCCACATTG     | 108 bp | Current paper;<br>Fig. S11    |
|                              | RpESXsp           | CATGAGCTACGTGACCAATTG    |        |                               |
| <i>Eif2s3y</i>               | <i>cESYsF2</i>    | CGTTATGCCGAGCAGATAGAA    | 104bp  | Current paper;<br>Fig. 2, S10 |
|                              | <i>cESYsR2</i>    | CCGTCTCAGTAGGAAGTAGGA    |        |                               |
| <i>Eif2s3x/y</i> ***         | <i>cEIFsF2</i>    | GACCAGAATGTTACAGAT       | 192bp  | Current paper;<br>Fig. 2, S10 |
|                              | <i>cEIFsR2</i>    | TACCAGCTATCAACAGAA       |        |                               |

---

\* Recognize endogenous and transgenic *Eif2s3x* but do not recognize any of the *Eif2s3x* retrogenes or pseudogenes; \*\* Recognize specifically transgene; \*\*\* Recognize endogenous and transgenic *Eif2s3x* transcripts but will also pick up genomic *Eif2s3x* X-linked predicted pseudogene (MGI: *Gm2223* or VegaSanger: RP23-191G17.4), if it is expressed; \*\*\*\* Recognize endogenous and transgenic *Eif2s3x* transcripts but do not amplify *Gm2223* or other *Eif2s3x* pseudogenes.

**Movie S1**

Round spermatid injection with germ cells from XO*Sox9*,*Eif2s3x* male.



## REFERENCES AND NOTES

1. Y. Yamauchi, J. M. Riel, Z. Stoytcheva, M. A. Ward, Two Y genes can replace the entire Y chromosome for assisted reproduction in the mouse. *Science* **343**, 69–72 (2014). [Medline doi:10.1126/science.1242544](#)
2. R. Sekido, R. Lovell-Badge, Sex determination involves synergistic action of SRY and SF1 on a specific Sox9 enhancer. *Nature* **453**, 930–934 (2008). [Medline doi:10.1038/nature06944](#)
3. V. P. Vidal, M. C. Chaboissier, D. G. de Rooij, A. Schedl, Sox9 induces testis development in XX transgenic mice. *Nat. Genet.* **28**, 216–217 (2001). [Medline doi:10.1038/90046](#)
4. Materials and methods and further details are available as supporting material on *Science Online*.
5. S. Mazeyrat, N. Saut, V. Grigoriev, S. K. Mahadevaiah, O. A. Ojarikre, A. Rattigan, C. Bishop, E. M. Eicher, M. J. Mitchell, P. S. Burgoyne, A Y-encoded subunit of the translation initiation factor Eif2 is essential for mouse spermatogenesis. *Nat. Genet.* **29**, 49–53 (2001). [Medline doi:10.1038/ng717](#)
6. S. Eggers, T. Ohnesorg, A. Sinclair, Genetic regulation of mammalian gonad development. *Nat. Rev. Endocrinol.* **10**, 673–683 (2014). [Medline doi:10.1038/nrendo.2014.163](#)
7. A. Quinn, P. Koopman, The molecular genetics of sex determination and sex reversal in mammals. *Semin. Reprod. Med.* **30**, 351–363 (2012). [Medline doi:10.1055/s-0032-1324718](#)
8. N. Warr, A. Greenfield, The molecular and cellular basis of gonadal sex reversal in mice and humans. *Dev. Biol.* **1**, 559–577 (2012). [Medline doi:10.1002/wdev.42](#)
9. W. Just, W. Rau, W. Vogel, M. Akhverdian, K. Fredga, J. A. Marshall Graves, E. Lyapunova, Absence of *Sry* in species of the vole *Ellobius*. *Nat. Genet.* **11**, 117–118 (1995). [Medline doi:10.1038/ng1095-117](#)
10. S. Soullier, C. Hanni, F. Catzefflis, P. Berta, V. Laudet, Male sex determination in the spiny rat *Tokudaia osimensis* (Rodentia: Muridae) is not *Sry* dependent. *Mamm. Genome* **9**, 590–592 (1998). [Medline doi:10.1007/s003359900823](#)
11. H. Gan, L. Wen, S. Liao, X. Lin, T. Ma, J. Liu, C. X. Song, M. Wang, C. He, C. Han, F. Tang, Dynamics of 5-hydroxymethylcytosine during mouse spermatogenesis. *Nat. Commun.* **4**, 1995 (2013). [Medline doi:10.1038/ncomms2995](#)
12. K. Jegalian, D. C. Page, A proposed path by which genes common to mammalian X and Y chromosomes evolve to become X inactivated. *Nature* **394**, 776–780 (1998). [Medline doi:10.1038/29522](#)
13. D. W. Bellott, J. F. Hughes, H. Skaletsky, L. G. Brown, T. Pyntikova, T. J. Cho, N. Koutseva, S. Zaghlul, T. Graves, S. Rock, C. Kremitzki, R. S. Fulton, S. Dugan, Y. Ding, D. Morton, Z. Khan, L. Lewis, C. Buhay, Q. Wang, J. Watt, M. Holder, S. Lee, L. Nazareth, J. Alföldi, S. Rozen, D. M. Muzny, W. C. Warren, R. A. Gibbs, R. K. Wilson, D. C. Page, Mammalian Y chromosomes retain widely expressed dosage-sensitive regulators. *Nature* **508**, 494–499 (2014). [Medline](#)

14. J. F. Hughes, H. Skaletsky, N. Koutseva, T. Pyntikova, D. C. Page, Sex chromosome-to-autosome transposition events counter Y-chromosome gene loss in mammals. *Genome Biol.* **16**, 104 (2015). [Medline doi:10.1186/s13059-015-0667-4](#)
15. J. Cocquet, P. J. Ellis, Y. Yamauchi, S. K. Mahadevaiah, N. A. Affara, M. A. Ward, P. S. Burgoyne, The multicopy gene *Sly* represses the sex chromosomes in the male mouse germline after meiosis. *PLoS Biol.* **7**, e1000244 (2009). [Medline doi:10.1371/journal.pbio.1000244](#)
16. J. M. Riel, Y. Yamauchi, A. Sugawara, H. Y. Li, V. Ruthig, Z. Stoytcheva, P. J. Ellis, J. Cocquet, M. A. Ward, Deficiency of the multi-copy mouse Y gene *Sly* causes sperm DNA damage and abnormal chromatin packaging. *J. Cell Sci.* **126**, 803–813 (2013). [Medline doi:10.1242/jcs.114488](#)
17. Y. Yamauchi, J. M. Riel, S. J. Wong, O. A. Ojarikre, P. S. Burgoyne, M. A. Ward, Live offspring from mice lacking the Y chromosome long arm gene complement. *Biol. Reprod.* **81**, 353–361 (2009). [Medline doi:10.1095/biolreprod.109.076307](#)
18. Y. Q. Soh, J. Alföldi, T. Pyntikova, L. G. Brown, T. Graves, P. J. Minx, R. S. Fulton, C. Kremitzki, N. Koutseva, J. L. Mueller, S. Rozen, J. F. Hughes, E. Owens, J. E. Womack, W. J. Murphy, Q. Cao, P. de Jong, W. C. Warren, R. K. Wilson, H. Skaletsky, D. C. Page, Sequencing the mouse Y chromosome reveals convergent gene acquisition and amplification on both sex chromosomes. *Cell* **159**, 800–813 (2014). [Medline doi:10.1016/j.cell.2014.09.052](#)
19. Y. Kimura, R. Yanagimachi, Intracytoplasmic sperm injection in the mouse. *Biol. Reprod.* **52**, 709–720 (1995). [Medline doi:10.1095/biolreprod52.4.709](#)
20. C. L. Chatot, C. A. Ziomek, B. D. Bavister, J. L. Lewis, I. Torres, An improved culture medium supports development of random-bred 1-cell mouse embryos in vitro. *J. Reprod. Fertil.* **86**, 679–688 (1989). [Medline](#)
21. J. Gubbay, J. Collignon, P. Koopman, B. Capel, A. Economou, A. Münsterberg, N. Vivian, P. Goodfellow, R. Lovell-Badge, A gene mapping to the sex-determining region of the mouse Y chromosome is a member of a novel family of embryonically expressed genes. *Nature* **346**, 245–250 (1990). [Medline doi:10.1038/346245a0](#)
22. J. Gubbay, N. Vivian, A. Economou, D. Jackson, P. Goodfellow, R. Lovell-Badge, Inverted repeat structure of the *Sry* locus in mice. *Proc. Natl. Acad. Sci. U.S.A.* **89**, 7953–7957 (1992). [Medline doi:10.1073/pnas.89.17.7953](#)
23. E. M. Eicher, D. W. Hale, P. A. Hunt, B. K. Lee, P. K. Tucker, T. R. King, J. T. Eppig, L. L. Washburn, The mouse Y\* chromosome involves a complex rearrangement, including interstitial positioning of the pseudoautosomal region. *Cytogenet. Cell Genet.* **57**, 221–230 (1991). [Medline doi:10.1159/000133152](#)
24. P. W. Lane, M. T. Davisson, *Patchy fur (Paf)*, a semidominant X-linked gene associated with a high level of X-Y nondisjunction in male mice. *J. Hered.* **81**, 43–50 (1990). [Medline](#)
25. S. K. Mahadevaiah, T. Odorisio, D. J. Elliott, A. Rattigan, M. Szot, S. H. Laval, L. L. Washburn, J. R. McCarrey, B. M. Cattanaach, R. Lovell-Badge, P. S. Burgoyne, Mouse homologues of the human AZF candidate gene *RBM* are expressed in spermatogonia and spermatids, and map to a Y chromosome deletion interval associated with a high

- incidence of sperm abnormalities. *Hum. Mol. Genet.* **7**, 715–727 (1998). [Medline doi:10.1093/hmg/7.4.715](#)
26. E. A. Ahmed, D. G. de Rooij, Staging of mouse seminiferous tubule cross-sections. *Methods Mol. Biol.* **558**, 263–277 (2009). [Medline doi:10.1007/978-1-60761-103-5\\_16](#)
27. P. Koopman, J. Gubbay, N. Vivian, P. Goodfellow, R. Lovell-Badge, Male development of chromosomally female mice transgenic for *Sry*. *Nature* **351**, 117–121 (1991). [Medline doi:10.1038/351117a0](#)
28. F. Barrionuevo, S. Bagheri-Fam, J. Klattig, R. Kist, M. M. Taketo, C. Englert, G. Scherer, Homozygous inactivation of *Sox9* causes complete XY sex reversal in mice. *Biol. Reprod.* **74**, 195–201 (2006). [Medline doi:10.1095/biolreprod.105.045930](#)
29. B. Bhagavath, L. C. Layman, R. Ullmann, Y. Shen, K. Ha, K. Rehman, S. Looney, P. G. McDonough, H. G. Kim, B. R. Carr, Familial 46,XY sex reversal without campomelic dysplasia caused by a deletion upstream of the *SOX9* gene. *Mol. Cell. Endocrinol.* **393**, 1–7 (2014). [Medline doi:10.1016/j.mce.2014.05.006](#)
30. M. C. Chaboissier, A. Kobayashi, V. I. Vidal, S. Lützkendorf, H. J. van de Kant, M. Wegner, D. G. de Rooij, R. R. Behringer, A. Schedl, Functional analysis of *Sox8* and *Sox9* during sex determination in the mouse. *Development* **131**, 1891–1901 (2004). [Medline doi:10.1242/dev.01087](#)
31. B. Huang, S. Wang, Y. Ning, A. N. Lamb, J. Bartley, Autosomal XX sex reversal caused by duplication of *SOX9*. *Am. J. Med. Genet.* **87**, 349–353 (1999). [Medline doi:10.1002/\(SICI\)1096-8628\(19991203\)87:4<349::AID-AJMG13>3.0.CO;2-N](#)
32. I. E. Ehrmann, P. S. Ellis, S. Mazeyrat, S. Duthie, N. Brockdorff, M. G. Mattei, M. A. Gavin, N. A. Affara, G. M. Brown, E. Simpson, M. J. Mitchell, D. M. Scott, Characterization of genes encoding translation initiation factor eIF-2gamma in mouse and human: Sex chromosome localization, escape from X-inactivation and evolution. *Hum. Mol. Genet.* **7**, 1725–1737 (1998). [Medline doi:10.1093/hmg/7.11.1725](#)
33. P. S. Burgoyne, E. P. Evans, K. Holland, XO monosomy is associated with reduced birthweight and lowered weight gain in the mouse. *J. Reprod. Fertil.* **68**, 381–385 (1983). [Medline doi:10.1530/jrf.0.0680381](#)
34. H. Royo, G. Polikiewicz, S. K. Mahadevaiah, H. Prosser, M. Mitchell, A. Bradley, D. G. de Rooij, P. S. Burgoyne, J. M. Turner, Evidence that meiotic sex chromosome inactivation is essential for male fertility. *Curr. Biol.* **20**, 2117–2123 (2010). [Medline doi:10.1016/j.cub.2010.11.010](#)
35. M. Ono, V. R. Harley, Disorders of sex development: New genes, new concepts. *Nat. Rev. Endocrinol.* **9**, 79–91 (2013). [Medline doi:10.1038/nrendo.2012.235](#)
36. Y. Arakawa, C. Nishida-Umehara, Y. Matsuda, S. Sutou, H. Suzuki, X-chromosomal localization of mammalian Y-linked genes in two XO species of the Ryukyu spiny rat. *Cytogenet. Genome Res.* **99**, 303–309 (2002). [Medline doi:10.1159/000071608](#)
37. A. Kuroiwa, Y. Ishiguchi, F. Yamada, A. Shintaro, Y. Matsuda, The process of a Y-loss event in an XO/XO mammal, the Ryukyu spiny rat. *Chromosoma* **119**, 519–526 (2010). [Medline doi:10.1007/s00412-010-0275-8](#)

38. N. Vernet, S. K. Mahadevaiah, Y. Yamauchi, F. Decarpentrie, M. J. Mitchell, M. A. Ward, P. S. Burgoyne, Mouse Y-linked *Zfy1* and *Zfy2* are expressed during the male-specific interphase between meiosis I and meiosis II and promote the 2nd meiotic division. *PLOS Genet.* **10**, e1004444 (2014). [Medline doi:10.1371/journal.pgen.1004444](#)
39. W. E. Wright, D. A. Sassoon, V. K. Lin, Myogenin, a factor regulating myogenesis, has a domain homologous to MyoD. *Cell* **56**, 607–617 (1989). [Medline doi:10.1016/0092-8674\(89\)90583-7](#)
40. T. R. King, G. J. Christianson, M. J. Mitchell, C. E. Bishop, D. Scott, I. Ehrmann, E. Simpson, E. M. Eicher, D. C. Roopenian, Deletion mapping by immunoselection against the H-Y histocompatibility antigen further resolves the *Sxra* region of the mouse Y chromosome and reveals complexity of the *Hya* locus. *Genomics* **24**, 159–168 (1994). [Medline doi:10.1006/geno.1994.1593](#)
41. S. Mazeyrat, N. Saut, C. A. Sargent, S. Grimmond, G. Longepied, I. E. Ehrmann, P. S. Ellis, A. Greenfield, N. A. Affara, M. J. Mitchell, The mouse Y chromosome interval necessary for spermatogonial proliferation is gene dense with syntenic homology to the human AZFa region. *Hum. Mol. Genet.* **7**, 1713–1724 (1998). [Medline doi:10.1093/hmg/7.11.1713](#)
42. A. Touré, V. Grigoriev, S. K. Mahadevaiah, A. Rattigan, O. A. Ojarikre, P. S. Burgoyne, A protein encoded by a member of the multicopy *Ssty* gene family located on the long arm of the mouse Y chromosome is expressed during sperm development. *Genomics* **83**, 140–147 (2004). [Medline doi:10.1016/S0888-7543\(03\)00216-7](#)
43. J. M. Turner, S. K. Mahadevaiah, R. Benavente, H. H. Offenberger, C. Heyting, P. S. Burgoyne, Analysis of male meiotic “sex body” proteins during XY female meiosis provides new insights into their functions. *Chromosoma* **109**, 426–432 (2000). [Medline doi:10.1007/s004120000097](#)
44. A. Touré, E. J. Clemente, P. Ellis, S. K. Mahadevaiah, O. A. Ojarikre, P. A. Ball, L. Reynard, K. L. Loveland, P. S. Burgoyne, N. A. Affara, Identification of novel Y chromosome encoded transcripts by testis transcriptome analysis of mice with deletions of the Y chromosome long arm. *Genome Biol.* **6**, R102 (2005). [Medline doi:10.1186/gb-2005-6-12-r102](#)
45. L. Zhao, E. T. Ng, T. L. Davidson, E. Longmuss, J. Urschitz, M. Elston, S. Moisyadi, J. Bowles, P. Koopman, Structure-function analysis of mouse *Sry* reveals dual essential roles of the C-terminal polyglutamine tract in sex determination. *Proc. Natl. Acad. Sci. U.S.A.* **111**, 11768–11773 (2014). [Medline doi:10.1073/pnas.1400666111](#)
46. A. A. Chassot, E. P. Gregoire, R. Lavery, M. M. Taketo, D. G. de Rooij, I. R. Adams, M. C. Chaboissier, RSPO1/ $\beta$ -catenin signaling pathway regulates oogonia differentiation and entry into meiosis in the mouse fetal ovary. *PLOS ONE* **6**, e25641 (2011). [Medline doi:10.1371/journal.pone.0025641](#)
47. G. Zeng, M. Germinaro, A. Micsenyi, N. K. Monga, A. Bell, A. Sood, V. Malhotra, N. Sood, V. Midda, D. K. Monga, D. M. Kokkinakis, S. P. Monga, Aberrant Wnt/ $\beta$ -catenin signaling in pancreatic adenocarcinoma. *Neoplasia* **8**, 279–289 (2006). [Medline](#)

48. M. A. García, M. Collado, C. Muñoz-Fontela, A. Matheu, L. Marcos-Villar, J. Arroyo, M. Esteban, M. Serrano, C. Rivas, Antiviral action of the tumor suppressor ARF. *EMBO J.* **25**, 4284–4292 (2006). [Medline doi:10.1038/sj.emboj.7601302](#)
49. A. Quinn, K. Kashimada, T. L. Davidson, E. T. Ng, K. Chawengsaksophak, J. Bowles, P. Koopman, A site-specific, single-copy transgenesis strategy to identify 5' regulatory sequences of the mouse testis-determining gene *Sry*. *PLOS ONE* **9**, e94813 (2014). [Medline doi:10.1371/journal.pone.0094813](#)
50. S. Werler, A. Poplinski, J. Gromoll, J. Wistuba, Expression of selected genes escaping from X inactivation in the 41, XX(Y)\* mouse model for Klinefelter's syndrome. *Acta Paediatr.* **100**, 885–891 (2011). [Medline doi:10.1111/j.1651-2227.2010.02112.x](#)
